# Supplementary material for: Potent Chlorambucil-Platinum(IV) Prodrugs
Source: MDPI journal article supplement (doi:10.3390/ijms231810471), 2022-09-09
Supplement: s1 [file s1]

## Supplementary Materials

### Table of Contents

#### NMR spectra of precursor platinum(II) complexes

|                  |                                                                                                                                                                                                          |   |
|------------------|----------------------------------------------------------------------------------------------------------------------------------------------------------------------------------------------------------|---|
| <b>Figure S1</b> | $^1\text{H}$ -NMR, 2D-COSY and $^1\text{H}$ - $^{195}\text{Pt}$ -HMQC spectra of <b>PHENSS</b> in $\text{D}_2\text{O}$ obtained at 298 K. Inset: structure of <b>PHENSS</b> with proton labeling system. | 6 |
| <b>Figure S2</b> | $^1\text{H}$ -NMR, 2D-COSY and $^1\text{H}$ - $^{195}\text{Pt}$ -HMQC spectra of <b>5MESS</b> in $\text{D}_2\text{O}$ obtained at 298 K. Inset: structure of <b>5MESS</b> with proton labeling system.   | 7 |
| <b>Figure S3</b> | $^1\text{H}$ -NMR, 2D-COSY and $^1\text{H}$ - $^{195}\text{Pt}$ -HMQC spectra of <b>56MESS</b> in $\text{D}_2\text{O}$ obtained at 298 K. Inset: structure of <b>56MESS</b> with proton labeling system. | 7 |

#### NMR spectra of precursor platinum(IV) complexes

|                  |                                                                                                                                                                                                                                                  |   |
|------------------|--------------------------------------------------------------------------------------------------------------------------------------------------------------------------------------------------------------------------------------------------|---|
| <b>Figure S4</b> | $^1\text{H}$ -NMR, 2D-COSY and $^1\text{H}$ - $^{195}\text{Pt}$ -HMQC spectra of <b>PHENSS(IV)(OH)<sub>2</sub></b> in $\text{D}_2\text{O}$ obtained at 298 K. Inset: structure of <b>PHENSS(IV)(OH)<sub>2</sub></b> with proton labeling system. | 8 |
| <b>Figure S5</b> | $^1\text{H}$ -NMR, 2D-COSY and $^1\text{H}$ - $^{195}\text{Pt}$ -HMQC spectra of <b>5MESS(IV)(OH)<sub>2</sub></b> in $\text{D}_2\text{O}$ obtained at 298 K. Inset: structure of <b>5MESS(IV)(OH)<sub>2</sub></b> with proton labeling system.   | 9 |
| <b>Figure S6</b> | $^1\text{H}$ -NMR, 2D-COSY and $^1\text{H}$ - $^{195}\text{Pt}$ -HMQC spectra of <b>56MESS(IV)(OH)<sub>2</sub></b> in $\text{D}_2\text{O}$ obtained at 298 K. Inset: structure of <b>56MESS(IV)(OH)<sub>2</sub></b> with proton labeling system. | 9 |

#### HPLC chromatograms

|                  |                                                                                                                                                                                                                                  |    |
|------------------|----------------------------------------------------------------------------------------------------------------------------------------------------------------------------------------------------------------------------------|----|
| <b>Figure S7</b> | HPLC chromatogram of CLB anhydride (at 17 min) with DCU by-product (at 15.9 min), within the collection wavelength of 254 nm obtained at 298 K, by an Agilent ZORBAX RX-C <sub>18</sub> column (100 × 4.6 mm, 3.5 μm pore size). | 10 |
| <b>Figure S8</b> | HPLC chromatogram of <b>PCLB</b> within the collection wavelength of 254 nm obtained at 298 K, by a Phenomenex Onyx™ Monolithic C <sub>18</sub> -reverse phase column (100 × 4.6 mm, 5 μm pore size).                            | 10 |

|                   |                                                                                                                                                                                                        |           |
|-------------------|--------------------------------------------------------------------------------------------------------------------------------------------------------------------------------------------------------|-----------|
| <b>Figure S9</b>  | HPLC chromatogram of <b>5CLB</b> within the collection wavelength of 254 nm obtained at 298 K, by a Phenomenex Onyx™ Monolithic C <sub>18</sub> -reverse phase column (100 × 4.6 mm, 5 μm pore size).  | <b>11</b> |
| <b>Figure S10</b> | HPLC chromatogram of <b>56CLB</b> within the collection wavelength of 254 nm obtained at 298 K, by a Phenomenex Onyx™ Monolithic C <sub>18</sub> -reverse phase column (100 × 4.6 mm, 5 μm pore size). | <b>11</b> |

## NMR spectra of platinum(IV)-CLB complexes

|                   |                                                                                                                                                                                                                          |           |
|-------------------|--------------------------------------------------------------------------------------------------------------------------------------------------------------------------------------------------------------------------|-----------|
| <b>Figure S11</b> | <sup>1</sup> H-NMR spectrum of <b>PCLB</b> in D <sub>2</sub> O obtained at 298 K. Inset: structure of <b>PCLB</b> with proton labeling system.                                                                           | <b>12</b> |
| <b>Figure S12</b> | <sup>1</sup> H-NMR spectrum of <b>5CLB</b> in D <sub>2</sub> O obtained at 298 K. Inset: structure of <b>5CLB</b> with proton labeling system.                                                                           | <b>13</b> |
| <b>Figure S13</b> | <sup>1</sup> H-NMR spectrum of <b>56CLB</b> in D <sub>2</sub> O obtained at 298 K. Inset: structure of <b>56CLB</b> with proton labeling system.                                                                         | <b>13</b> |
| <b>Figure S14</b> | 2D-COSY spectrum of <b>PCLB</b> in D <sub>2</sub> O obtained at 298 K. Inset: structure of <b>PCLB</b> with proton labeling system.                                                                                      | <b>14</b> |
| <b>Figure S15</b> | 2D-COSY spectrum of <b>5CLB</b> in D <sub>2</sub> O obtained at 298 K. Inset: structure of <b>5CLB</b> with proton labeling system.                                                                                      | <b>14</b> |
| <b>Figure S16</b> | 2D-COSY spectrum of <b>56CLB</b> in D <sub>2</sub> O obtained at 298 K. Inset: structure of <b>56CLB</b> with proton labeling system.                                                                                    | <b>15</b> |
| <b>Figure S17</b> | <sup>1</sup> H- <sup>195</sup> Pt-HMQC spectrum of <b>PCLB</b> in D <sub>2</sub> O obtained at 298 K. Region: 400 ppm. Inset: structure of <b>PCLB</b> with proton labelling system and arrows that indicate coupling.   | <b>16</b> |
| <b>Figure S18</b> | <sup>1</sup> H- <sup>195</sup> Pt-HMQC spectrum of <b>PCLB</b> in D <sub>2</sub> O obtained at 298 K. Region: -2800 ppm. Absence of platinum(II) resonance.                                                              | <b>17</b> |
| <b>Figure S19</b> | <sup>1</sup> H- <sup>195</sup> Pt-HMQC spectrum of <b>5CLB</b> in D <sub>2</sub> O obtained at 298 K. Region: 400 ppm. Inset: structure of <b>5CLB</b> with proton labelling system and arrow that indicate coupling.    | <b>18</b> |
| <b>Figure S20</b> | <sup>1</sup> H- <sup>195</sup> Pt-HMQC spectrum of <b>5CLB</b> in D <sub>2</sub> O obtained at 298 K. Region: -2800 ppm. Absence of platinum(II) resonance.                                                              | <b>19</b> |
| <b>Figure S21</b> | <sup>1</sup> H- <sup>195</sup> Pt-HMQC spectrum of <b>56CLB</b> in D <sub>2</sub> O obtained at 298 K. Region: 400 ppm. Inset: structure of <b>56CLB</b> with proton labelling system and arrows that indicate coupling. | <b>20</b> |

|                   |                                                                                                                                                                  |           |
|-------------------|------------------------------------------------------------------------------------------------------------------------------------------------------------------|-----------|
| <b>Figure S22</b> | $^1\text{H}$ - $^{195}\text{Pt}$ -HMQC spectrum of <b>56CLB</b> in $\text{D}_2\text{O}$ obtained at 298 K. Region: -2800 ppm. Absence of platinum(II) resonance. | <b>21</b> |
|-------------------|------------------------------------------------------------------------------------------------------------------------------------------------------------------|-----------|

## UV spectra of platinum(IV)-CLB complexes

|                   |                                                                                                                                                          |           |
|-------------------|----------------------------------------------------------------------------------------------------------------------------------------------------------|-----------|
| <b>Figure S23</b> | UV spectra of <b>PCLB</b> obtained at 298 K. Inset: structure of <b>PCLB</b> and generated plot curves within the wavelengths 203 and 279 nm at 298 K.   | <b>22</b> |
| <b>Figure S24</b> | UV spectra of <b>5CLB</b> obtained at 298 K. Inset: structure of <b>5CLB</b> and generated plot curves within the wavelengths 204 and 284 nm at 298 K.   | <b>23</b> |
| <b>Figure S25</b> | UV spectra of <b>56CLB</b> obtained at 298 K. Inset: structure of <b>56CLB</b> and generated plot curves within the wavelengths 204 and 291 nm at 298 K. | <b>23</b> |

## CD spectra of platinum(IV)-CLB complexes

|                   |                                                                                                                |           |
|-------------------|----------------------------------------------------------------------------------------------------------------|-----------|
| <b>Figure S26</b> | CD spectrum of <b>PCLB</b> in d.i. $\text{H}_2\text{O}$ obtained at 298 K. Inset: structure of <b>PCLB</b> .   | <b>24</b> |
| <b>Figure S27</b> | CD spectrum of <b>5CLB</b> in d.i. $\text{H}_2\text{O}$ obtained at 298 K. Inset: structure of <b>5CLB</b> .   | <b>25</b> |
| <b>Figure S28</b> | CD spectrum of <b>56CLB</b> in d.i. $\text{H}_2\text{O}$ obtained at 298 K. Inset: structure of <b>56CLB</b> . | <b>26</b> |

## ESI-MS spectra of platinum(IV)-CLB complexes

|                   |                                                                                                                                                                                       |           |
|-------------------|---------------------------------------------------------------------------------------------------------------------------------------------------------------------------------------|-----------|
| <b>Figure S29</b> | ESI-MS spectrum of <b>PCLB</b> in d.i. $\text{H}_2\text{O}$ obtained at 298 K, using a Waters SYNAPT G2-Si quadrupole time-of-flight (QTOF) HDMS. Inset: structure of <b>PCLB</b> .   | <b>27</b> |
| <b>Figure S30</b> | ESI-MS spectrum of <b>5CLB</b> in d.i. $\text{H}_2\text{O}$ obtained at 298 K, using a Waters SYNAPT G2-Si quadrupole time-of-flight (QTOF) HDMS. Inset: structure of <b>5CLB</b> .   | <b>28</b> |
| <b>Figure S31</b> | ESI-MS spectrum of <b>56CLB</b> in d.i. $\text{H}_2\text{O}$ obtained at 298 K, using a Waters SYNAPT G2-Si quadrupole time-of-flight (QTOF) HDMS. Inset: structure of <b>56CLB</b> . | <b>29</b> |

## Stability experiments

|                   |                                                                                                                                                                                          |    |
|-------------------|------------------------------------------------------------------------------------------------------------------------------------------------------------------------------------------|----|
| <b>Figure S32</b> | Combined HPLC chromatograms of <b>PCLB</b> , <b>5CLB</b> and <b>56CLB</b> in three solvent systems, obtained at 298 K. Inset: structures of <b>PCLB</b> , <b>5CLB</b> and <b>56CLB</b> . | 30 |
| <b>Figure S33</b> | Combined HPLC chromatograms of <b>PCLB</b> , <b>5CLB</b> and <b>56CLB</b> in three solvent systems, obtained at 298 K at 36 h.                                                           | 31 |

## Lipophilicity measurements

|                   |                                                                                                                                                                                                             |    |
|-------------------|-------------------------------------------------------------------------------------------------------------------------------------------------------------------------------------------------------------|----|
| <b>Figure S34</b> | Generated plot curve of $\log k$ <i>versus</i> concentration of organic solvent, $\text{CH}_3\text{CN}$ to determine the chromatographic lipophilicity index, $\log k_w$ of the platinum(IV)-CLB complexes. | 32 |
|-------------------|-------------------------------------------------------------------------------------------------------------------------------------------------------------------------------------------------------------|----|

## Reduction reaction experiments

|                   |                                                                                                                                                                                                                                                                                                       |    |
|-------------------|-------------------------------------------------------------------------------------------------------------------------------------------------------------------------------------------------------------------------------------------------------------------------------------------------------|----|
| <b>Figure S35</b> | ESI-MS spectra of the reduced <b>PCLB</b> prodrug, highlighting the formation of the corresponding platinum(II) congener, <b>PHENSS</b> .                                                                                                                                                             | 33 |
| <b>Figure S36</b> | $^1\text{H}$ -NMR spectra of <b>5CLB</b> with PBS and AsA in $\text{D}_2\text{O}$ at 310.15 K, in different time intervals, highlighting the movement of resonances from the phenanthroline protons and the aromatic protons of the CLB ligand. <b>T</b> represents time in min.                      | 34 |
| <b>Figure S37</b> | $^1\text{H}$ -NMR spectra of <b>56CLB</b> with PBS and AsA in $\text{D}_2\text{O}$ at 310.15 K, in different time intervals, highlighting the movement of resonances from the phenanthroline protons and the aromatic protons of the CLB ligand. <b>T</b> represents time in min.                     | 34 |
| <b>Figure S38</b> | $1\text{D-}^{195}\text{Pt}$ NMR spectra of <b>5CLB</b> with PBS and AsA in $\text{D}_2\text{O}$ at 310.15 K, within the regions of 400 and -2800 ppm, highlighting the complete reduction of the complex after 1 h. Inset: structures of <b>5CLB</b> and its platinum(II) scaffold, <b>5MESS</b> .    | 35 |
| <b>Figure S39</b> | $1\text{D-}^{195}\text{Pt}$ NMR spectra of <b>56CLB</b> with PBS and AsA in $\text{D}_2\text{O}$ at 310.15 K, within the regions of 400 and -2800 ppm, highlighting the complete reduction of the complex after 1 h. Inset: structures of <b>56CLB</b> and its platinum(II) scaffold, <b>56MESS</b> . | 36 |
| <b>Figure S40</b> | ESI-MS spectra of the reduced <b>5CLB</b> prodrug, highlighting the formation of the corresponding platinum(II) congener, <b>5MESS</b> .                                                                                                                                                              | 37 |
| <b>Figure S41</b> | ESI-MS spectra of the reduced <b>56CLB</b> prodrug, highlighting the formation of the corresponding platinum(II) congener, <b>56MESS</b> .                                                                                                                                                            | 38 |

## ROS experiments



**Figure S42:** ROS production upon treatment with **PCLB**, **5CLB**, **56CLB**, cisplatin, 39 together with precursor platinum(II) and (IV) scaffolds in HT29 colon cancer cell line at 0, 0.25, 0.5, 1, 3, 6, 12, 24, 48 and 72 h. TBHP: t-butyl hydroperoxide, NAC: N-acetylcysteine. Data points denote mean  $\pm$  SEM. n = 3 from three independent experiments where samples were run in triplicates.

## NMR spectra of precursor platinum(II) complexes

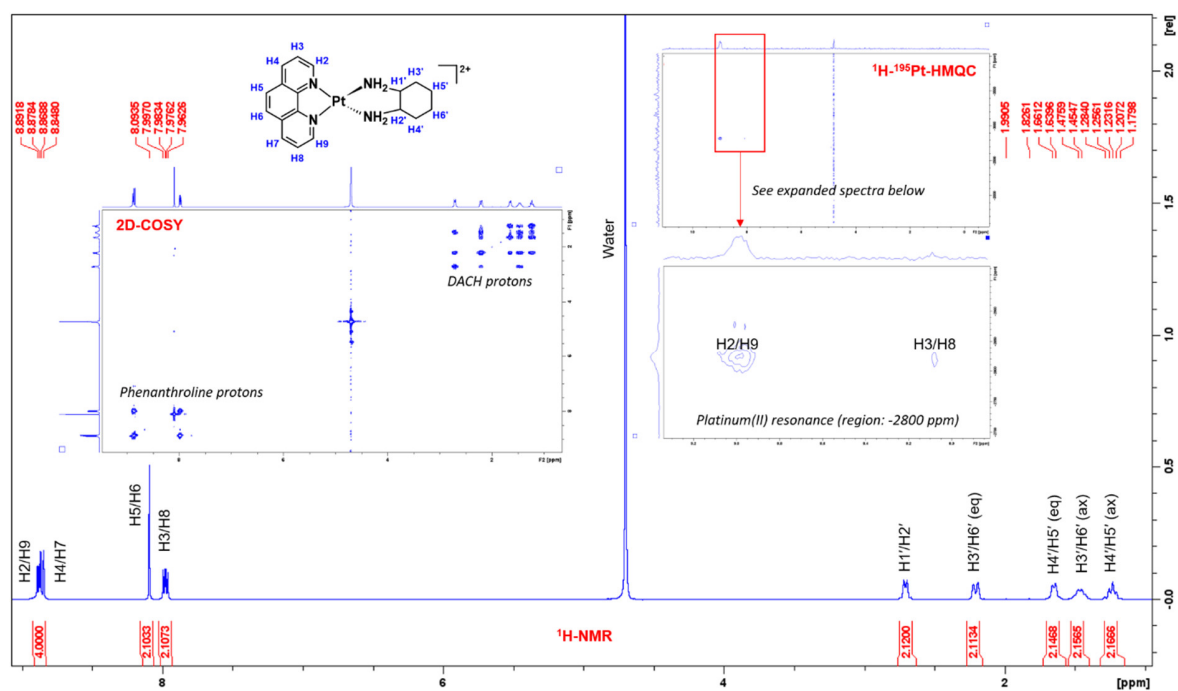

**Figure S1:** <sup>1</sup>H-NMR, 2D-COSY and <sup>1</sup>H-<sup>195</sup>Pt-HMQC spectra of **PHENSS** in D<sub>2</sub>O obtained at 298 K. Inset: structure of **PHENSS** with proton labeling system.

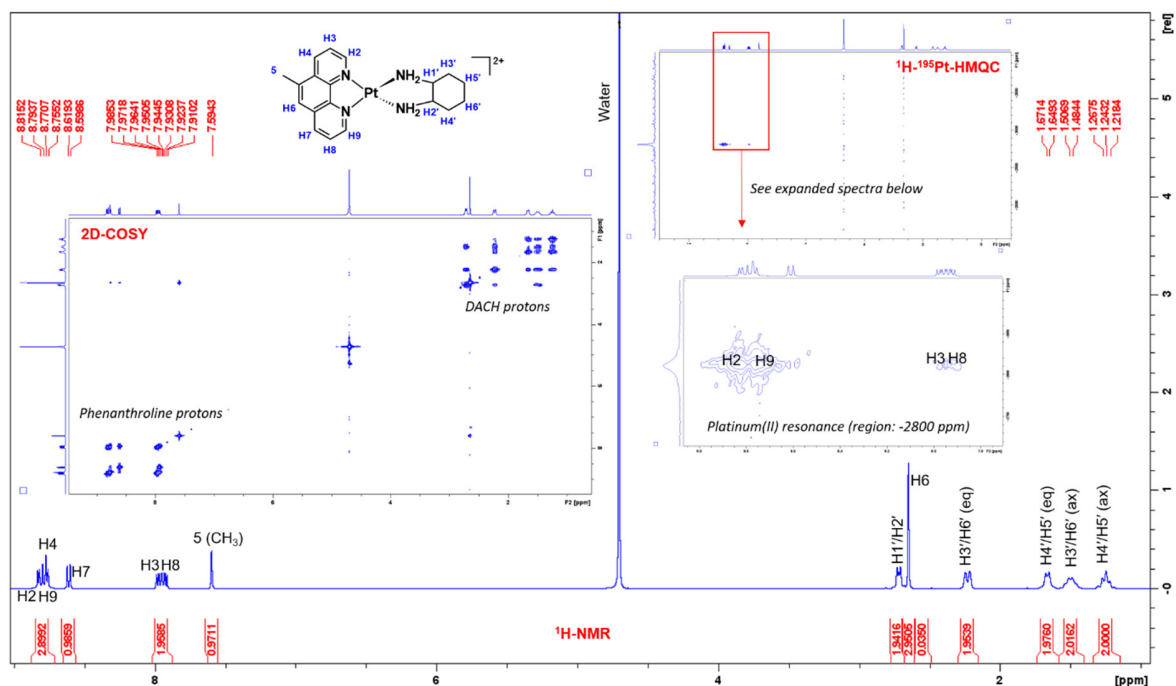

**Figure S2:**  $^1\text{H}$ -NMR, 2D-COSY and  $^1\text{H}$ - $^{195}\text{Pt}$ -HMQC spectra of **5MESS** in  $\text{D}_2\text{O}$  obtained at 298 K. Inset: structure of **5MESS** with proton labeling system.

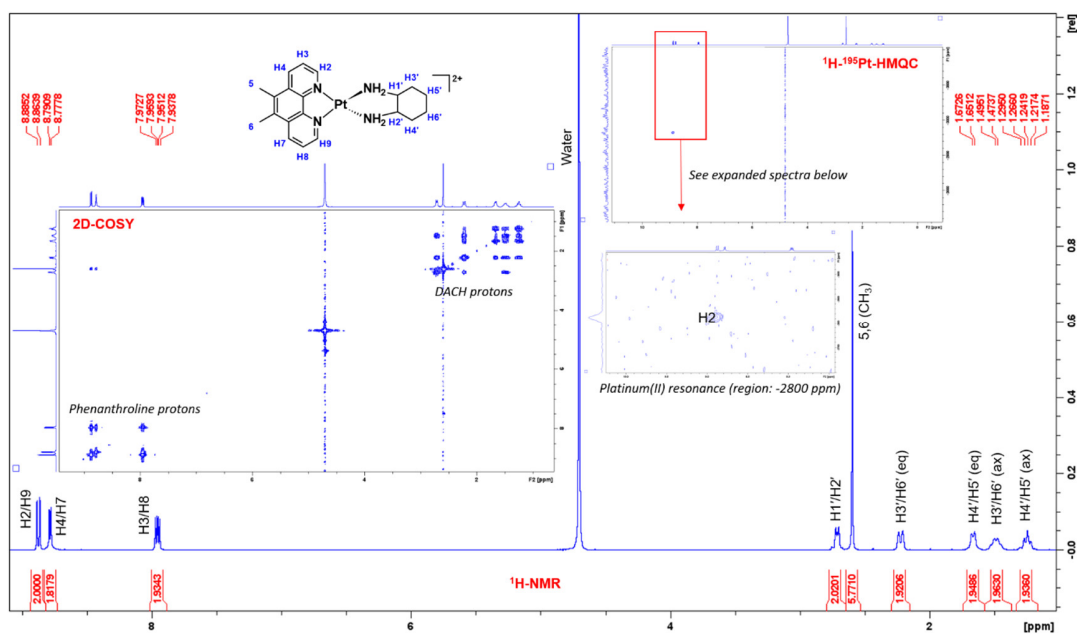

**Figure S3:**  $^1\text{H}$ -NMR, 2D-COSY and  $^1\text{H}$ - $^{195}\text{Pt}$ -HMQC spectra of **56MESS** in  $\text{D}_2\text{O}$  obtained at 298 K. Inset: structure of **56MESS** with proton labeling system.

## NMR spectra of precursor platinum(IV) dihydroxy complexes

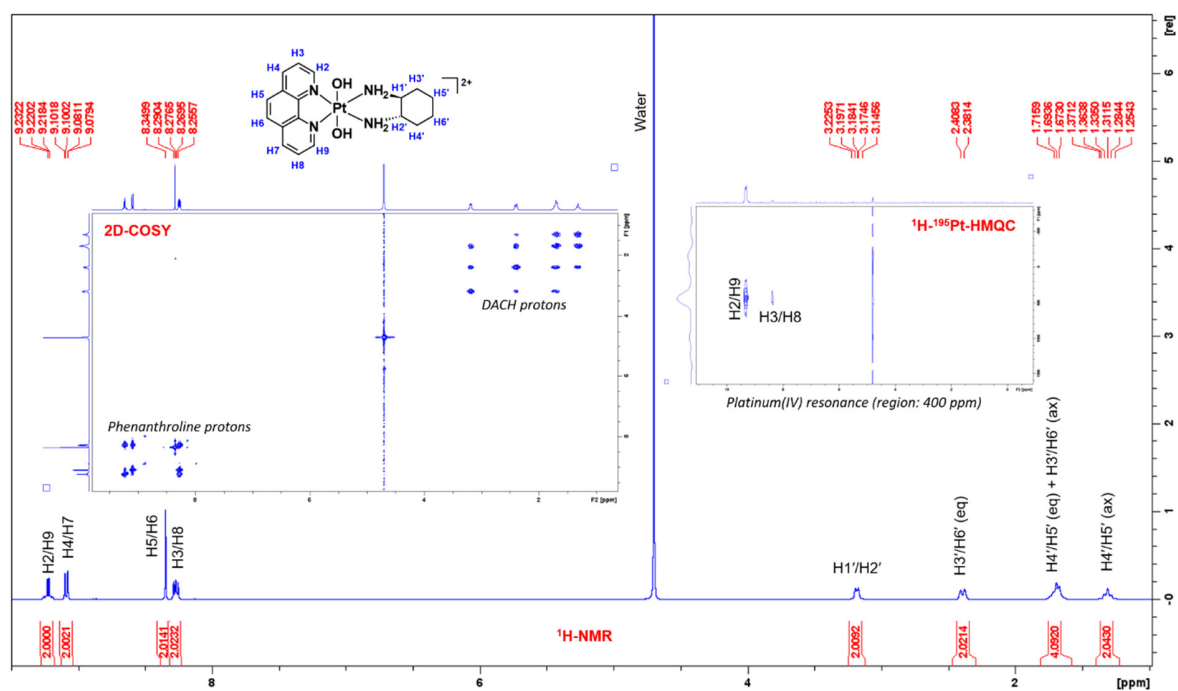

**Figure S4:**  $^1\text{H}$ -NMR, 2D-COSY and  $^1\text{H}$ - $^{195}\text{Pt}$ -HMQC spectra of **PHENSS(IV)(OH)<sub>2</sub>** in  $\text{D}_2\text{O}$  obtained at 298 K. Inset: structure of **PHENSS(IV)(OH)<sub>2</sub>** with proton labeling system.

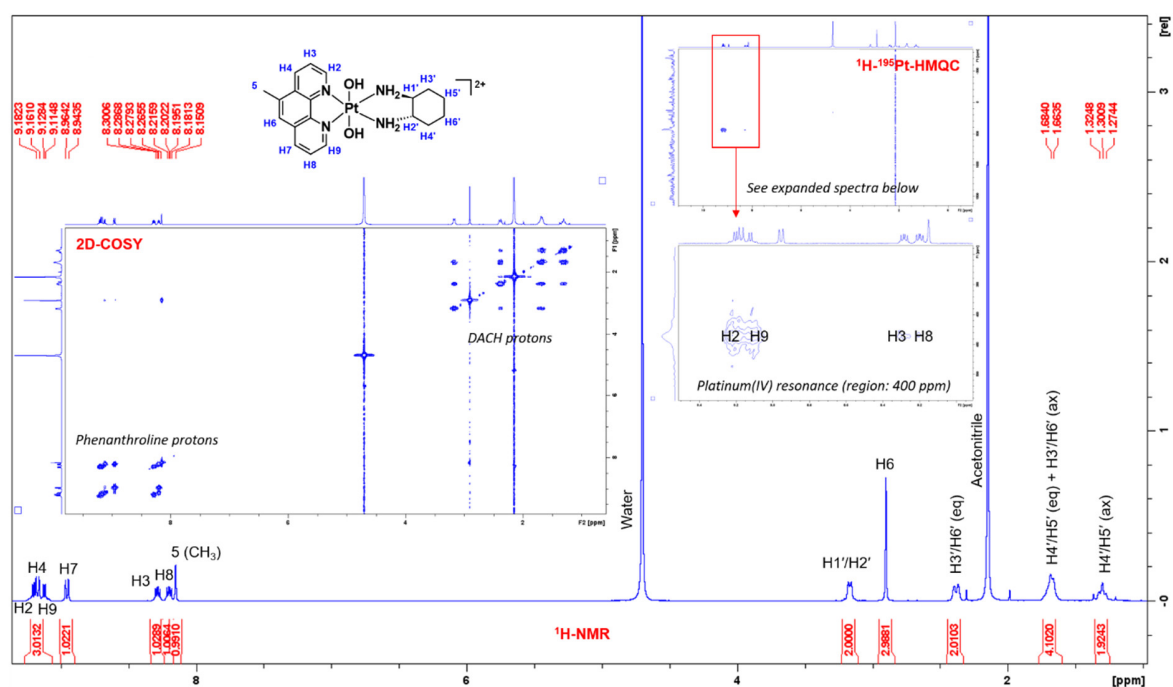

**Figure S5:**  $^1\text{H}$ -NMR, 2D-COSY and  $^1\text{H}$ - $^{195}\text{Pt}$ -HMQC spectra of **5MESS(IV)(OH)<sub>2</sub>** in  $\text{D}_2\text{O}$  obtained at 298 K. Inset: structure of **5MESS(IV)(OH)<sub>2</sub>** with proton labeling system.

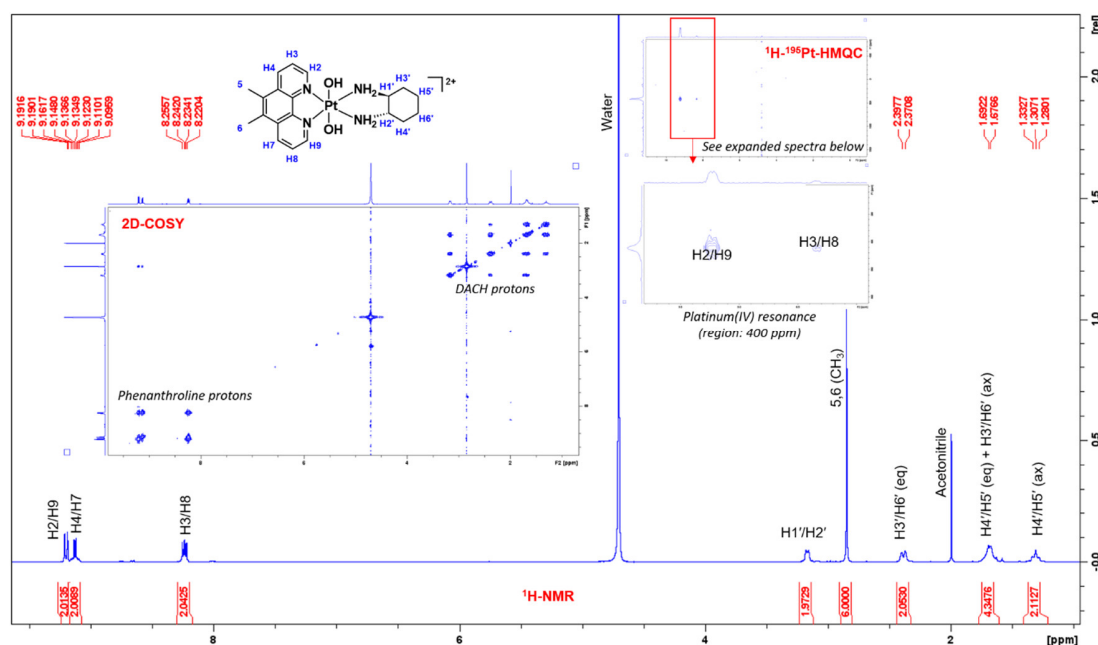

**Figure S6:**  $^1\text{H}$ -NMR, 2D-COSY and  $^1\text{H}$ - $^{195}\text{Pt}$ -HMQC spectra of **56MESS(IV)(OH)<sub>2</sub>** in  $\text{D}_2\text{O}$  obtained at 298 K. Inset: structure of **56MESS(IV)(OH)<sub>2</sub>** with proton labeling system.

### HPLC chromatogram of CLB anhydride

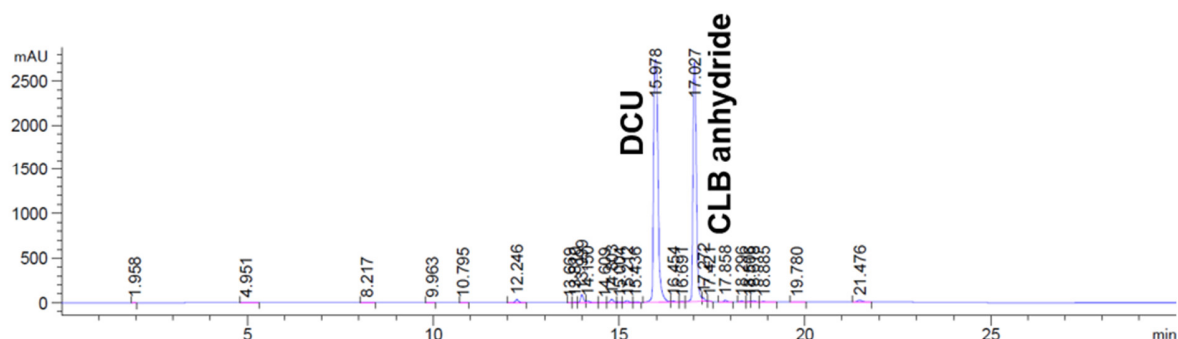

**Figure S7:** HPLC chromatogram of CLB anhydride (at 17 min) with DCU by-product (at 15.9 min), within the collection wavelength of 254 nm obtained at 298 K, by an Agilent ZORBAX RX-C<sub>18</sub> column (100 × 4.6 mm, 3.5 μm pore size).

### HPLC chromatograms of platinum(IV)-CLB complexes

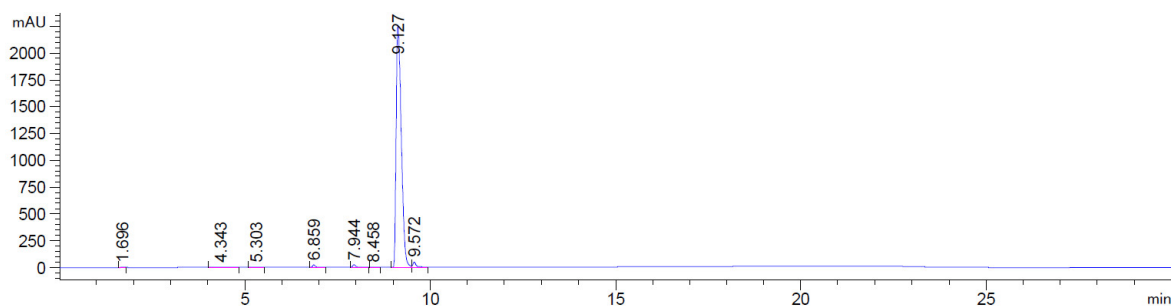

**Figure S8:** HPLC chromatogram of **PCLB** within the collection wavelength of 254 nm obtained at 298 K, by a Phenomenex Onyx™ Monolithic C<sub>18</sub>-reverse phase column (100 × 4.6 mm, 5 μm pore size).

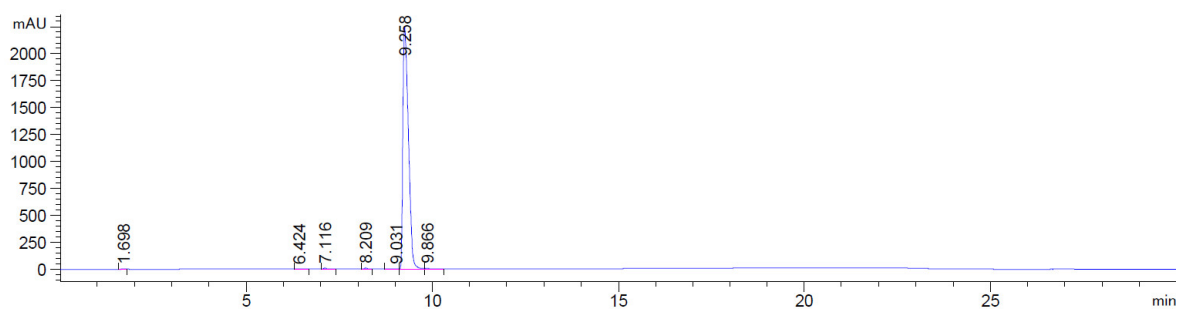

**Figure S9:** HPLC chromatogram of **5CLB** within the collection wavelength of 254 nm obtained at 298 K, by a Phenomenex Onyx™ Monolithic C<sub>18</sub>-reverse phase column (100 × 4.6 mm, 5 μm pore size).

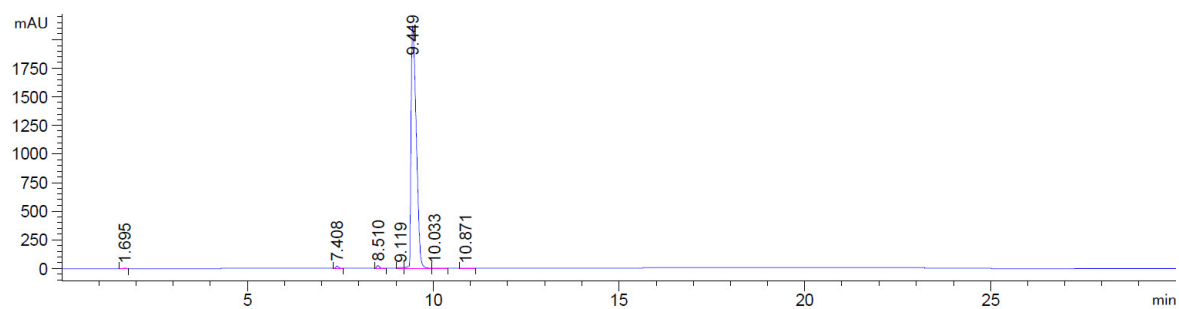

**Figure S10:** HPLC chromatogram of **56CLB** within the collection wavelength of 254 nm obtained at 298 K, by a Phenomenex Onyx™ Monolithic C<sub>18</sub>-reverse phase column (100 × 4.6 mm, 5 μm pore size).

## NMR spectra of platinum(IV)-CLB complexes

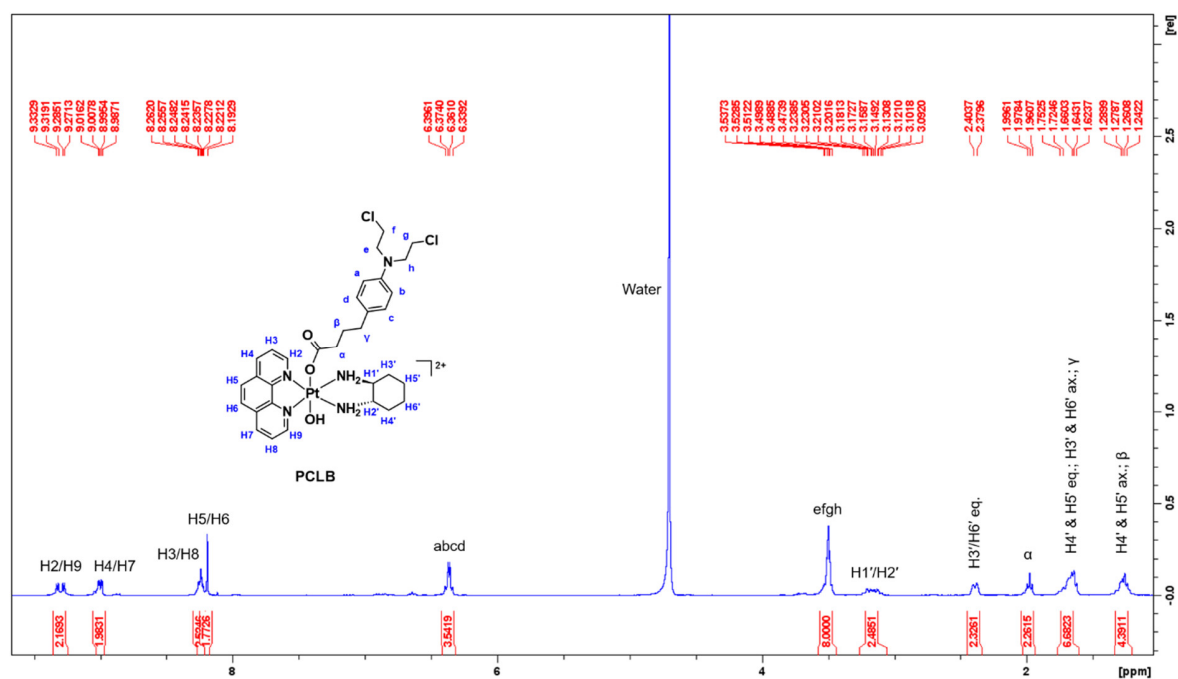

**Figure S11:**  $^1\text{H}$ -NMR spectrum of PCLB in  $\text{D}_2\text{O}$  obtained at 298 K. Inset: structure of PCLB with proton labeling system.



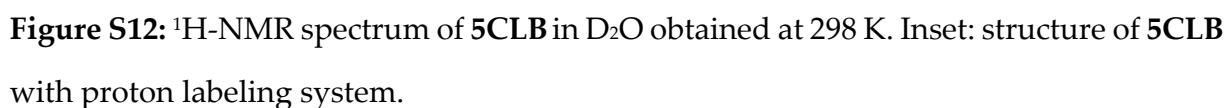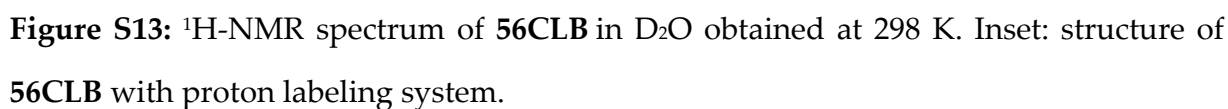

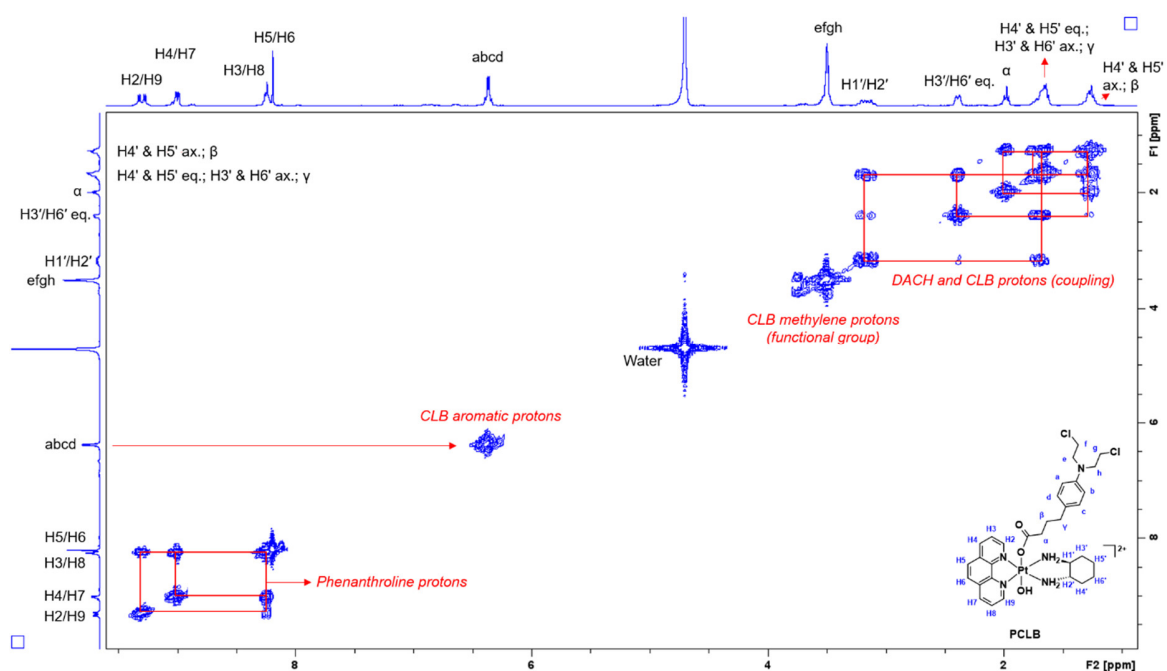

**Figure S14:** 2D-COSY spectrum of **PCLB** in D<sub>2</sub>O obtained at 298 K. Inset: structure of **PCLB** with proton labeling system.

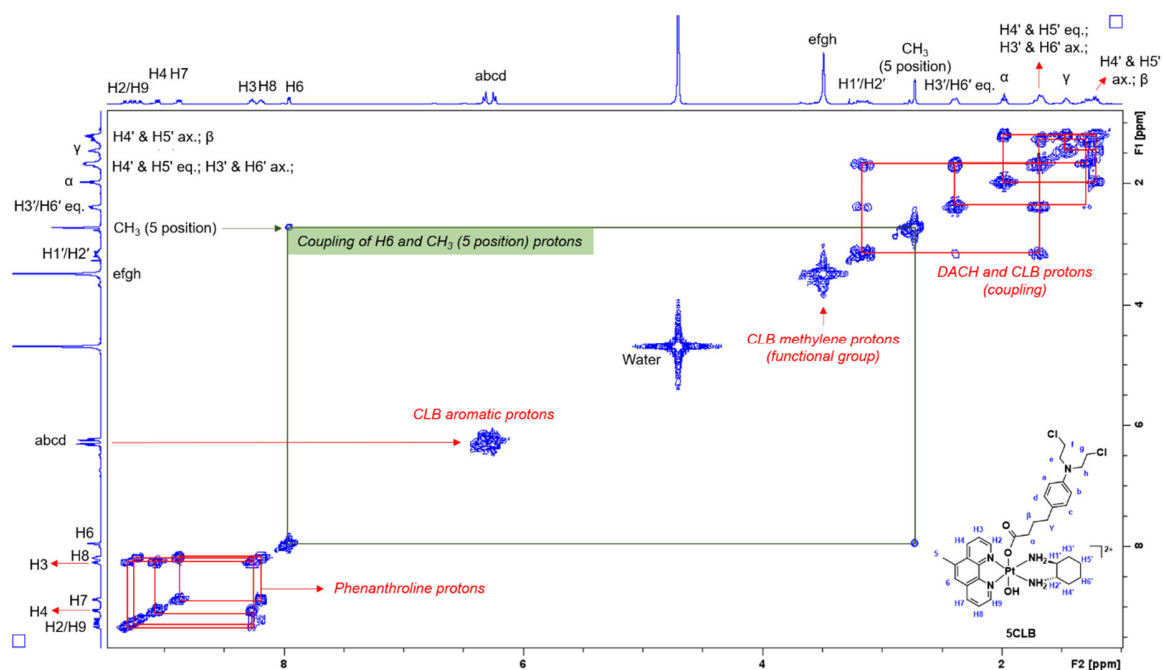

**Figure S15:** 2D-COSY spectrum of **5CLB** in D<sub>2</sub>O obtained at 298 K. Inset: structure of **5CLB** with proton labeling system.

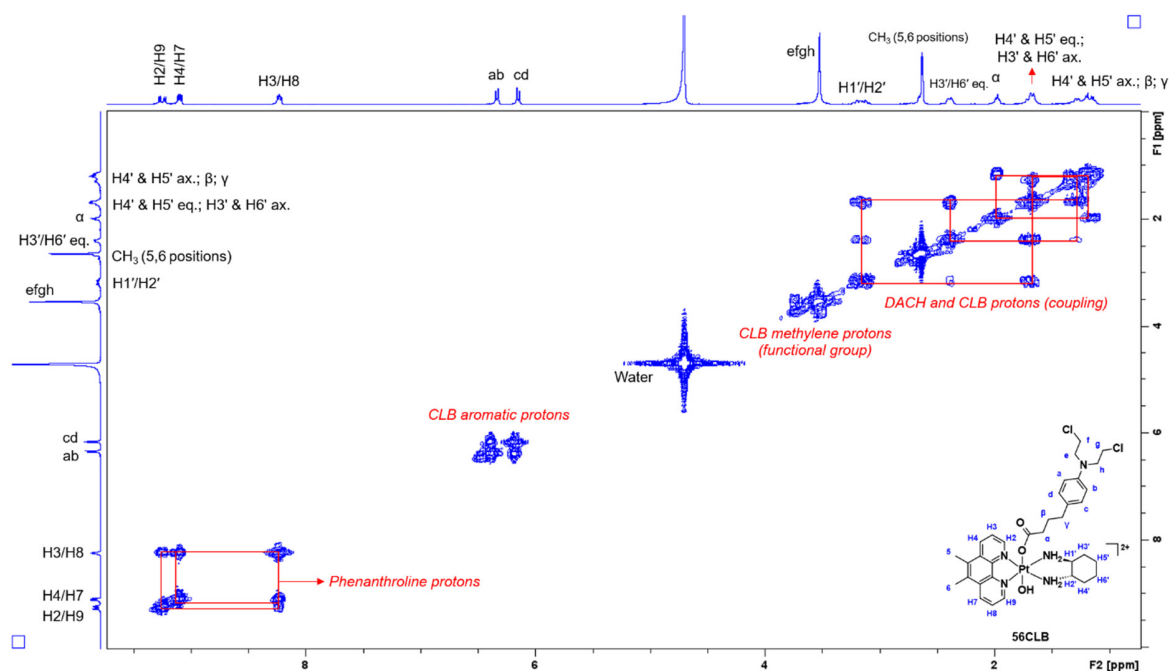

**Figure S16:** 2D-COSY spectrum of **56CLB** in  $D_2O$  obtained at 298 K. Inset: structure of **56CLB** with proton labeling system.

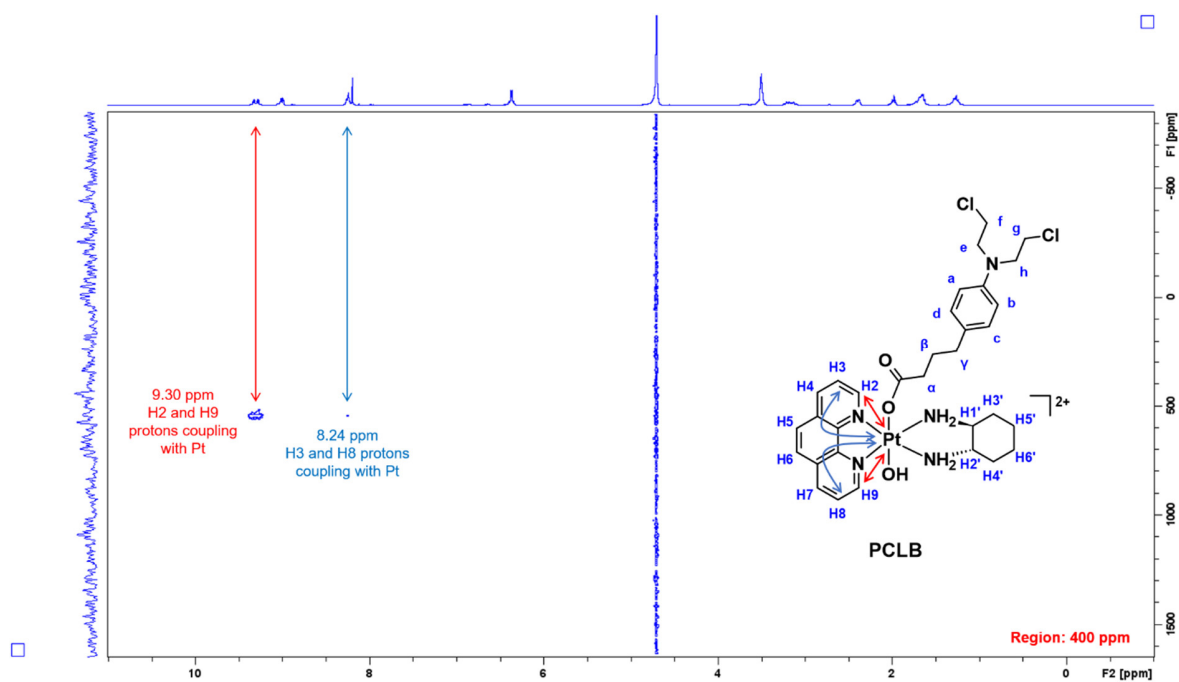

**Figure S17:**  $^1\text{H}$ - $^{195}\text{Pt}$ -HMQC spectrum of **PCLB** in  $\text{D}_2\text{O}$  obtained at 298 K. Region: 400 ppm. Inset: structure of **PCLB** with proton labelling system and arrows that indicate coupling.

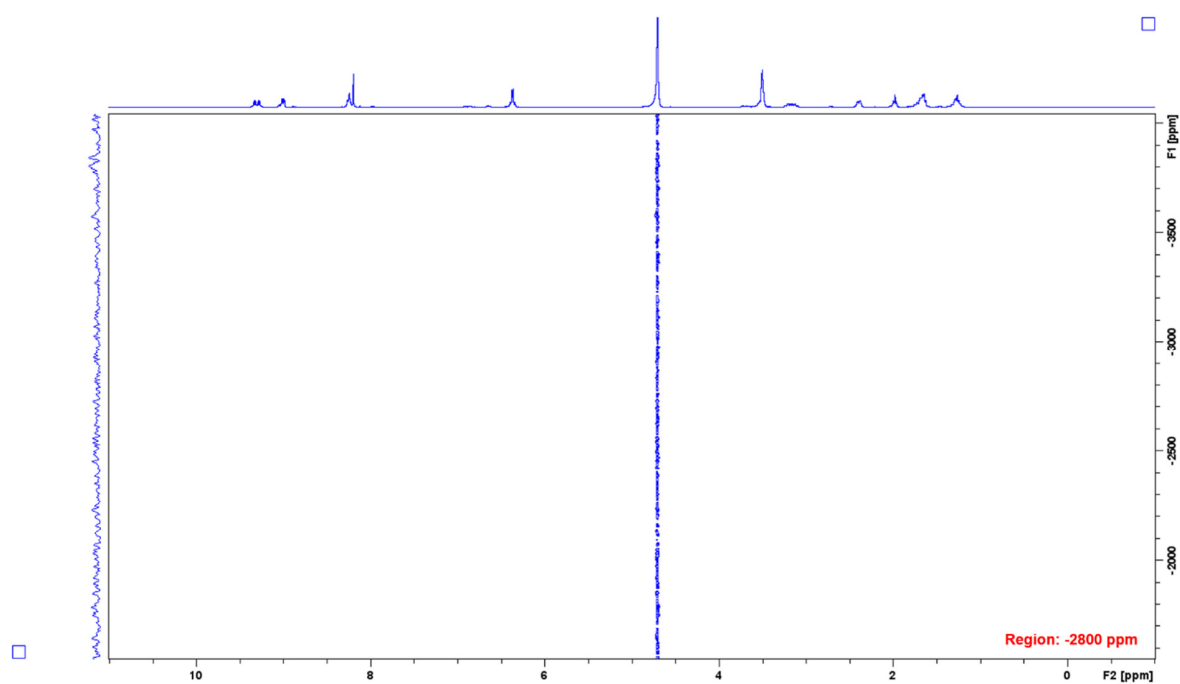

**Figure S18:**  $^1\text{H}$ - $^{195}\text{Pt}$ -HMQC spectrum of **PCLB** in  $\text{D}_2\text{O}$  obtained at 298 K. Region: -2800 ppm. Absence of platinum(II) resonance.

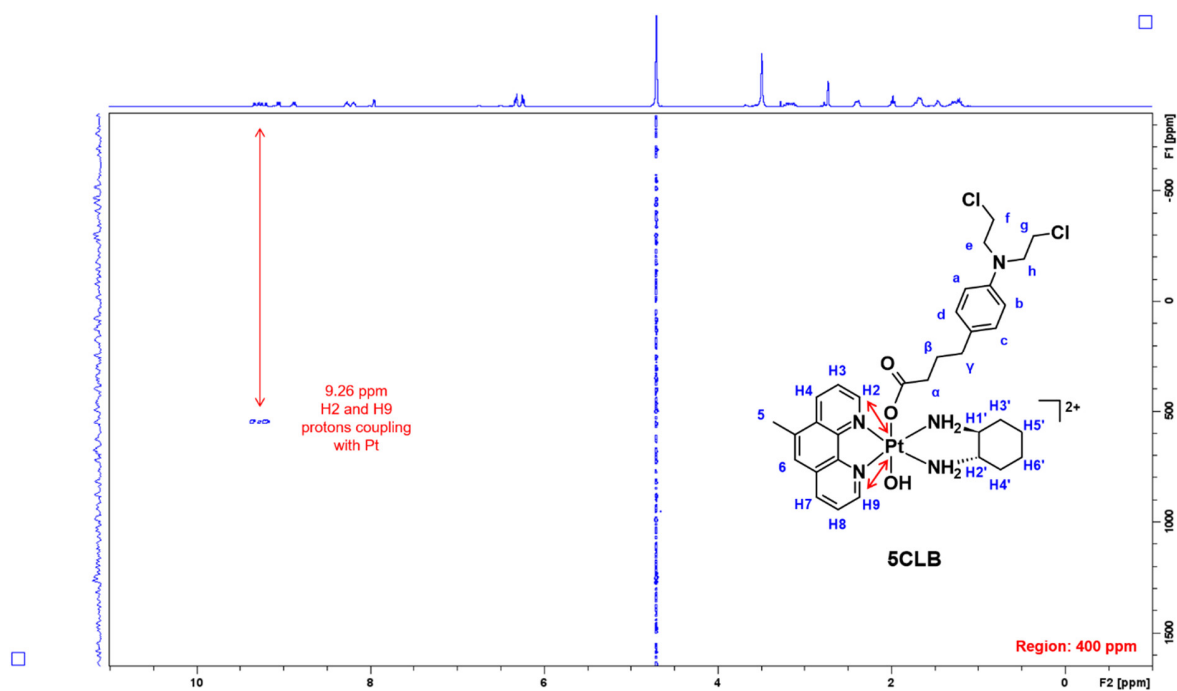

**Figure S19:**  $^1\text{H}$ - $^{195}\text{Pt}$ -HMQC spectrum of **5CLB** in  $\text{D}_2\text{O}$  obtained at 298 K. Region: 400 ppm. Inset: structure of **5CLB** with proton labelling system and arrow that indicate coupling.

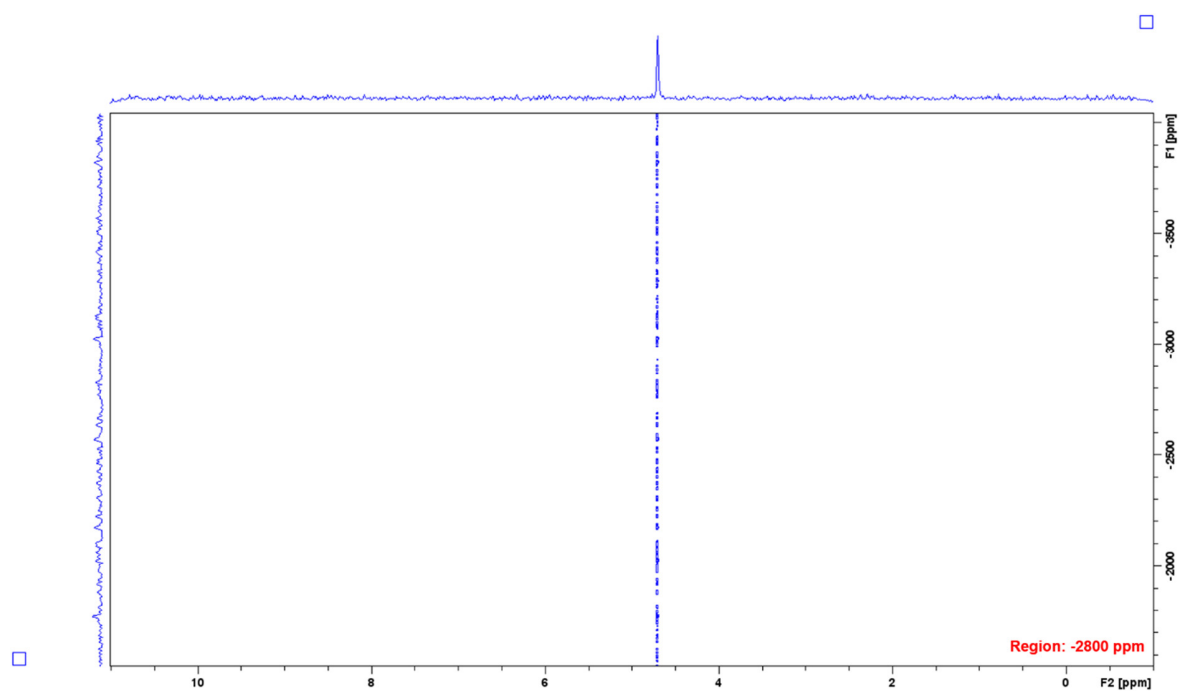

**Figure S20:**  $^1\text{H}$ - $^{195}\text{Pt}$ -HMQC spectrum of **5CLB** in  $\text{D}_2\text{O}$  obtained at 298 K. Region: -2800 ppm. Absence of platinum(II) resonance.

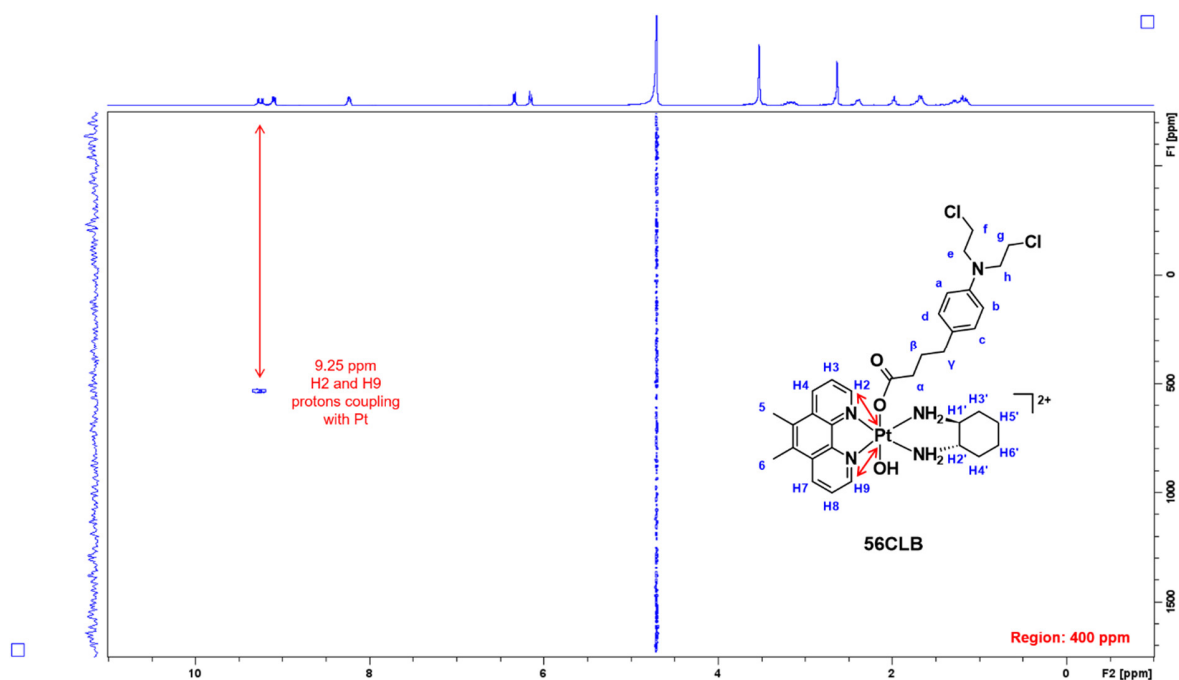

**Figure S21:**  $^1\text{H}$ - $^{195}\text{Pt}$ -HMQC spectrum of **56CLB** in  $\text{D}_2\text{O}$  obtained at 298 K. Region: 400 ppm. Inset: structure of **56CLB** with proton labelling system and arrows that indicate coupling.



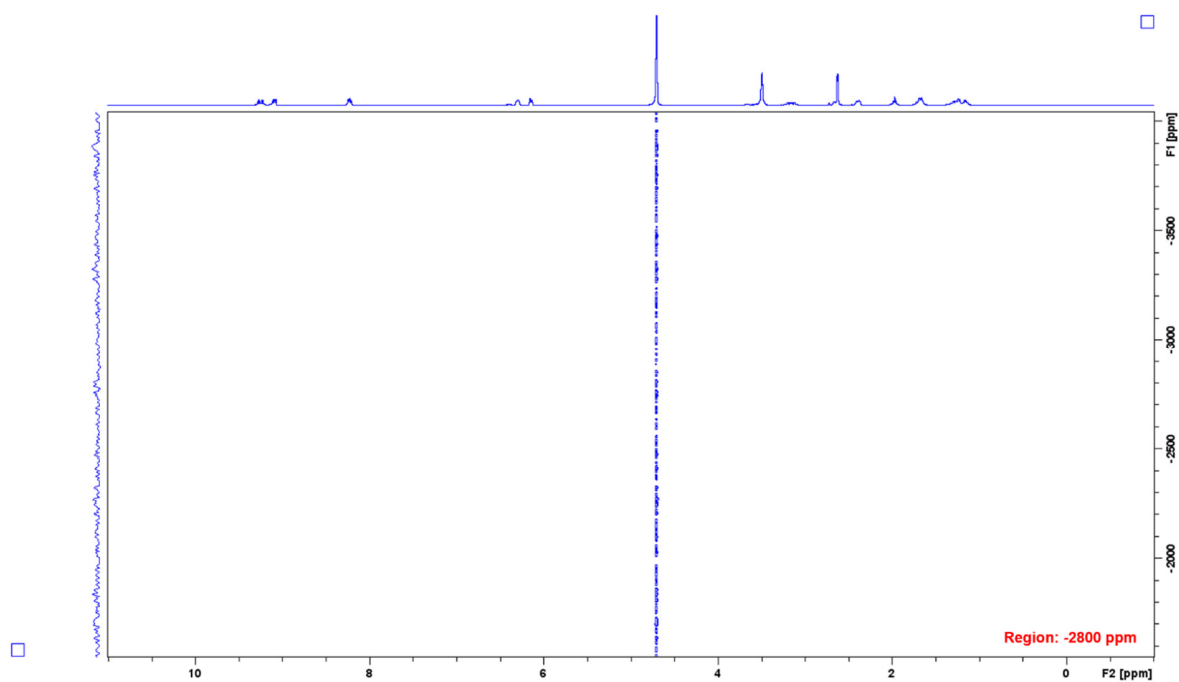

**Figure S22:**  $^1\text{H}$ - $^{195}\text{Pt}$ -HMQC spectrum of **56CLB** in  $\text{D}_2\text{O}$  obtained at 298 K. Region: -2800 ppm. Absence of platinum(II) resonance.

### UV spectra of platinum(IV)-CLB complexes

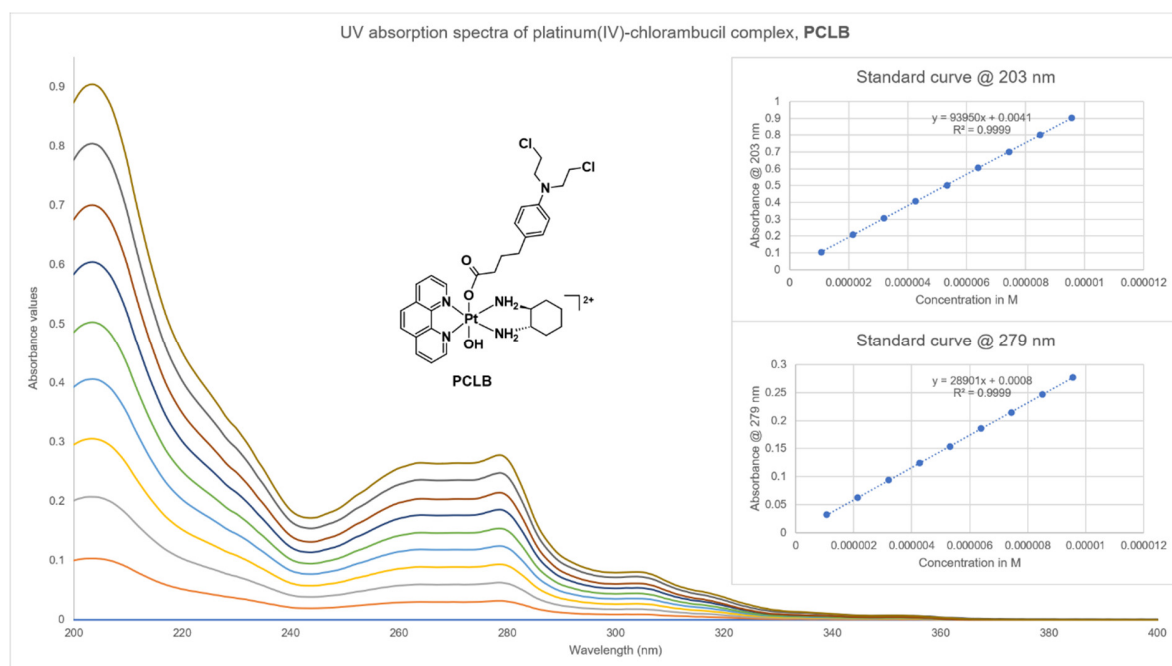

**Figure S23:** UV spectra of **PCLB** obtained at 298 K. Inset: structure of **PCLB** and generated plot curves within the wavelengths 203 and 279 nm at 298 K.

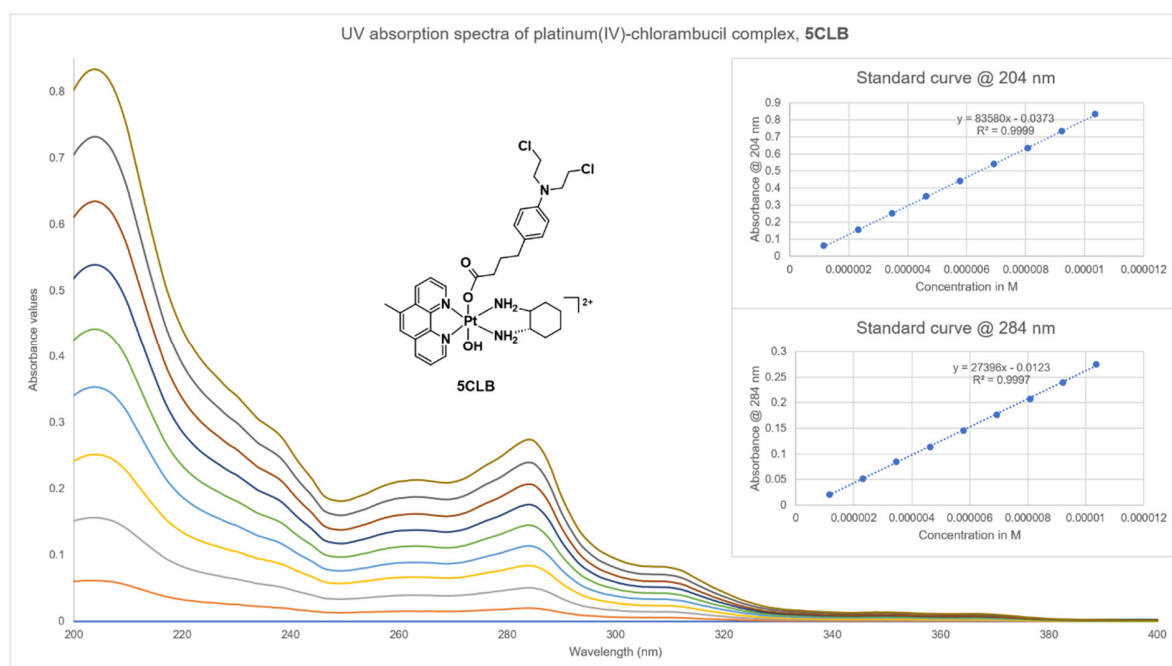

**Figure S24:** UV spectra of **5CLB** obtained at 298 K. Inset: structure of **5CLB** and generated plot curves within the wavelengths 204 and 284 nm at 298 K.

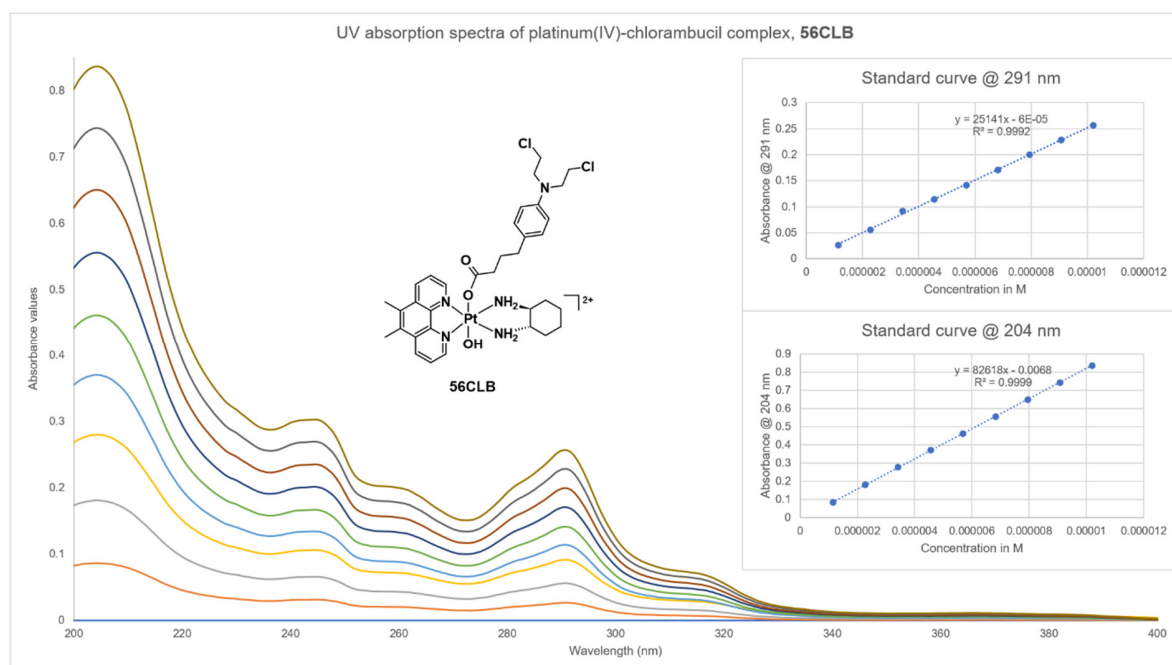

**Figure S25:** UV spectra of **56CLB** obtained at 298 K. Inset: structure of **56CLB** and generated plot curves within the wavelengths 204 and 291 nm at 298 K.

CD spectra of platinum(IV)-CLB complexes

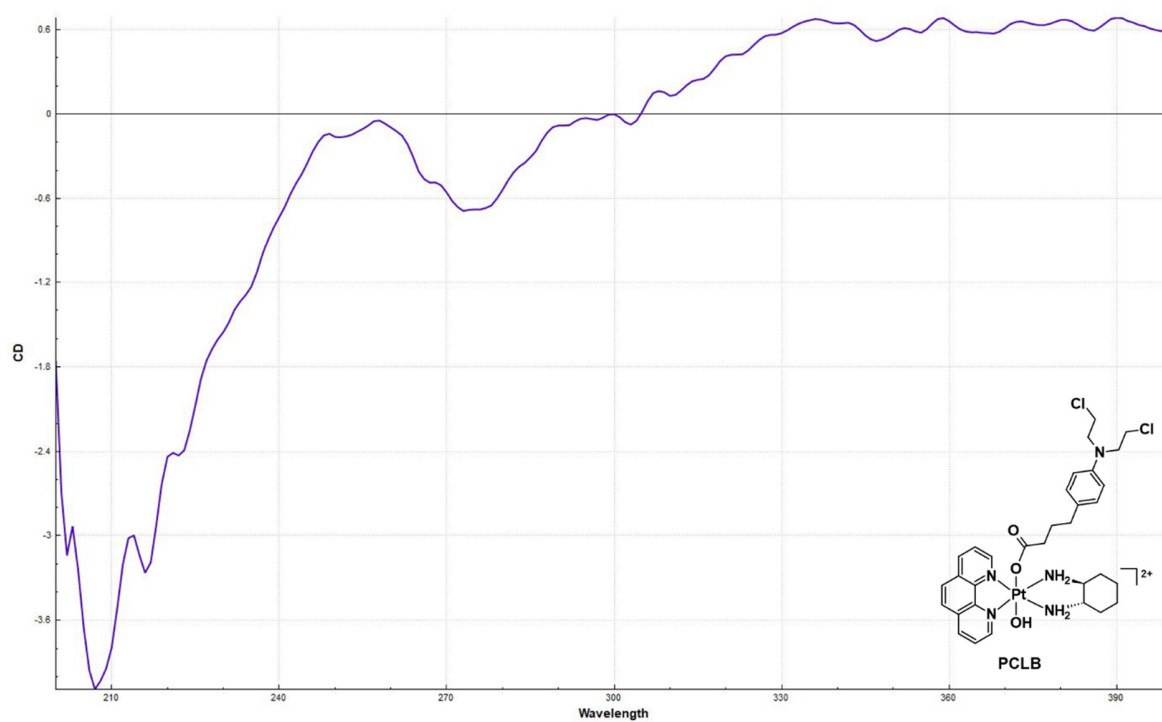

**Figure S26:** CD spectrum of **PCLB** in d.i.H<sub>2</sub>O obtained at 298 K. Inset: structure of **PCLB**.

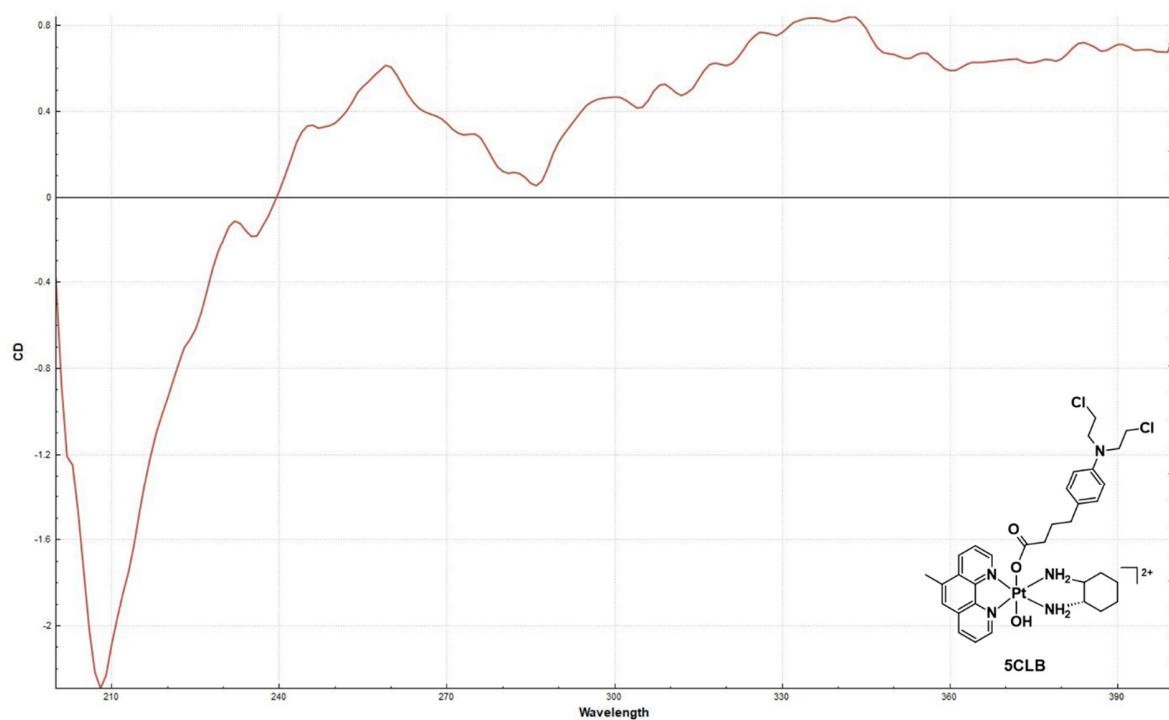

**Figure S27:** CD spectrum of **5CLB** in d.i.H<sub>2</sub>O obtained at 298 K. Inset: structure of **5CLB**.

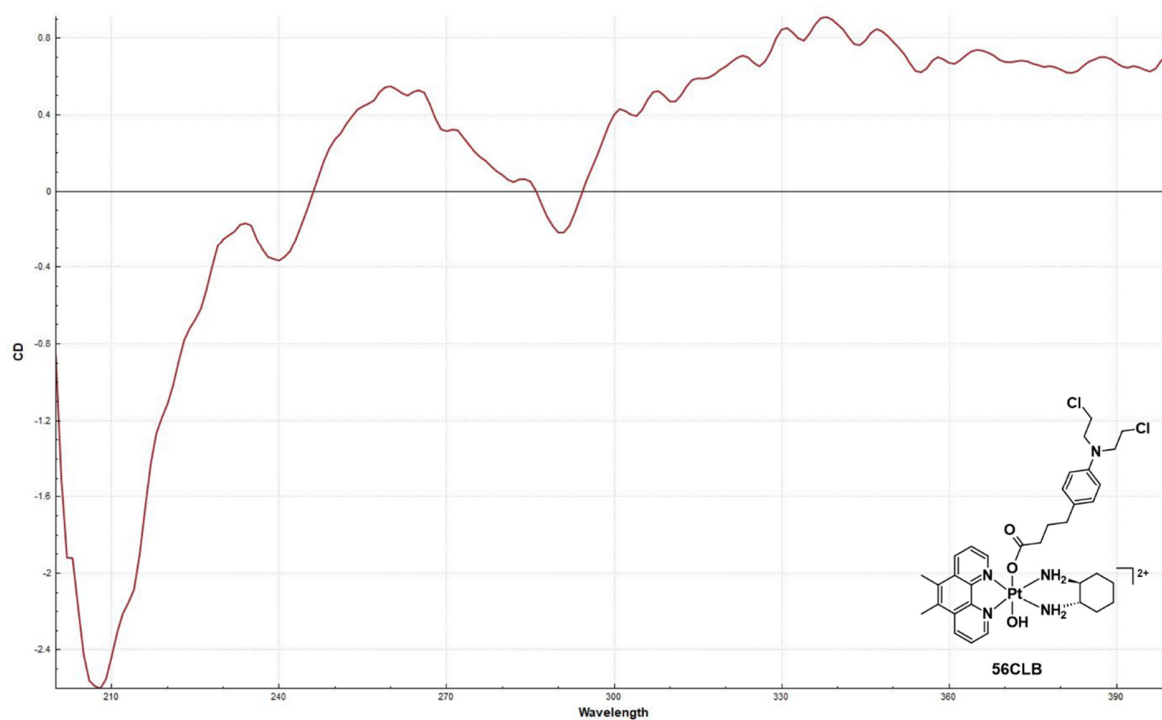

**Figure S28:** CD spectrum of **56CLB** in d.i.H<sub>2</sub>O obtained at 298 K. Inset: structure of **56CLB**.

ESI-MS spectra of platinum(IV)-CLB complexes

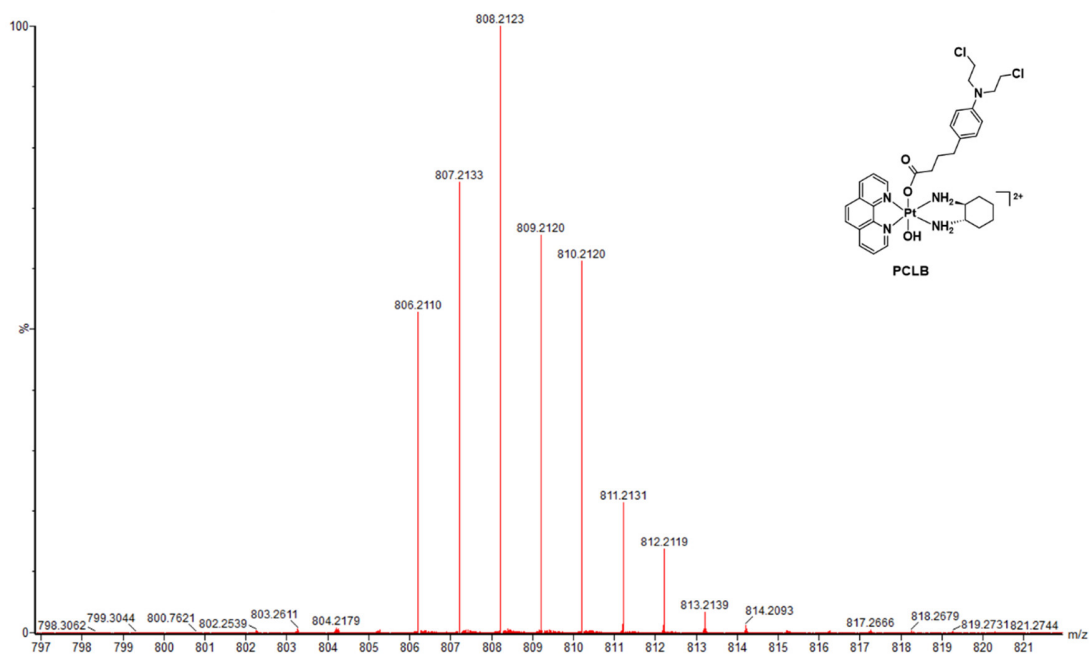

**Figure S29:** ESI-MS spectrum of **PCLB** in d.i.H<sub>2</sub>O obtained at 298 K, using a Waters SYNAPT G2-Si quadrupole time-of-flight (QTOF) HDMS. Inset: structure of **PCLB**.

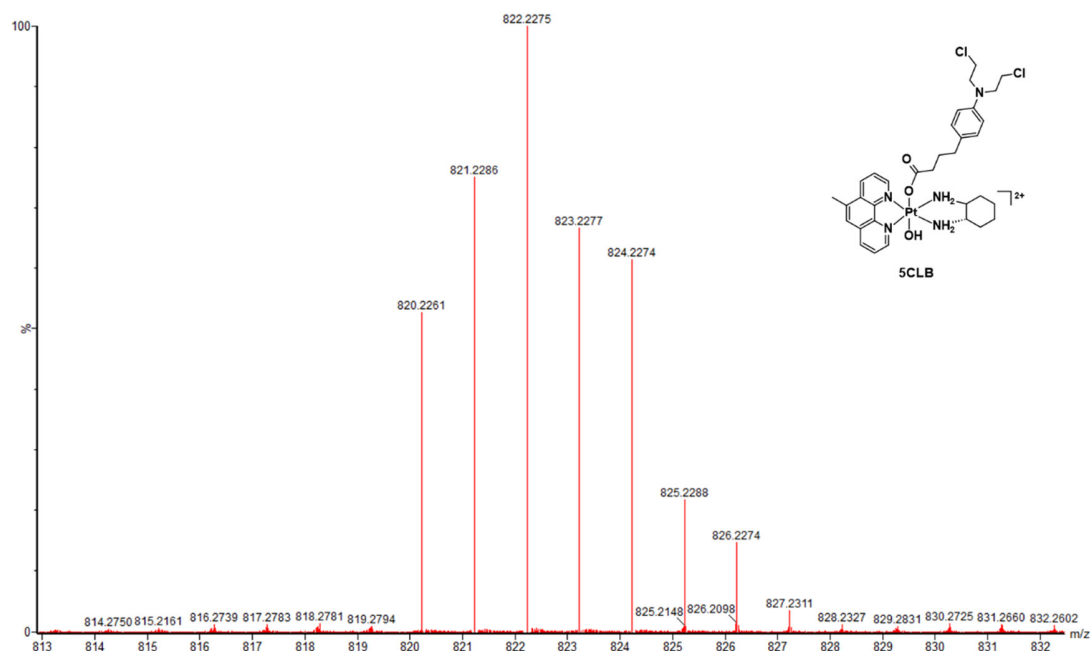

**Figure S30:** ESI-MS spectrum of **5CLB** in d.i.H<sub>2</sub>O obtained at 298 K, using a Waters SYNAPT G2-Si quadrupole time-of-flight (QTOF) HDMS. Inset: structure of **5CLB**.



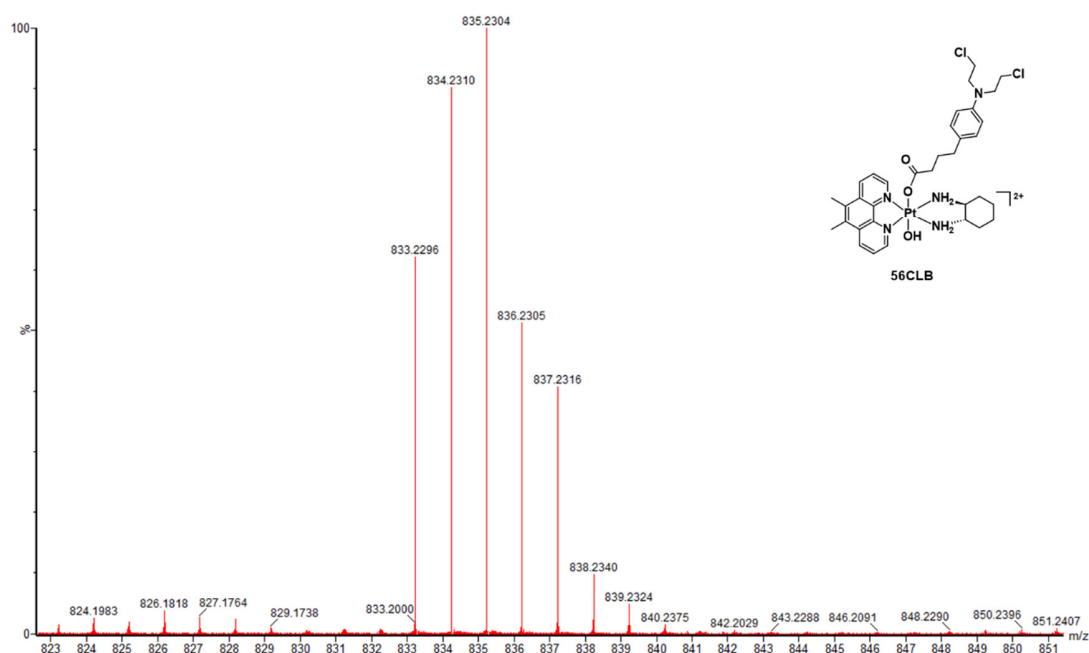

**Figure S31:** ESI-MS spectrum of **56CLB** in d.i.H<sub>2</sub>O obtained at 298 K, using a Waters SYNAPT G2-Si quadrupole time-of-flight (QTOF) HDMS. Inset: structure of **56CLB**.

## Stability experiments

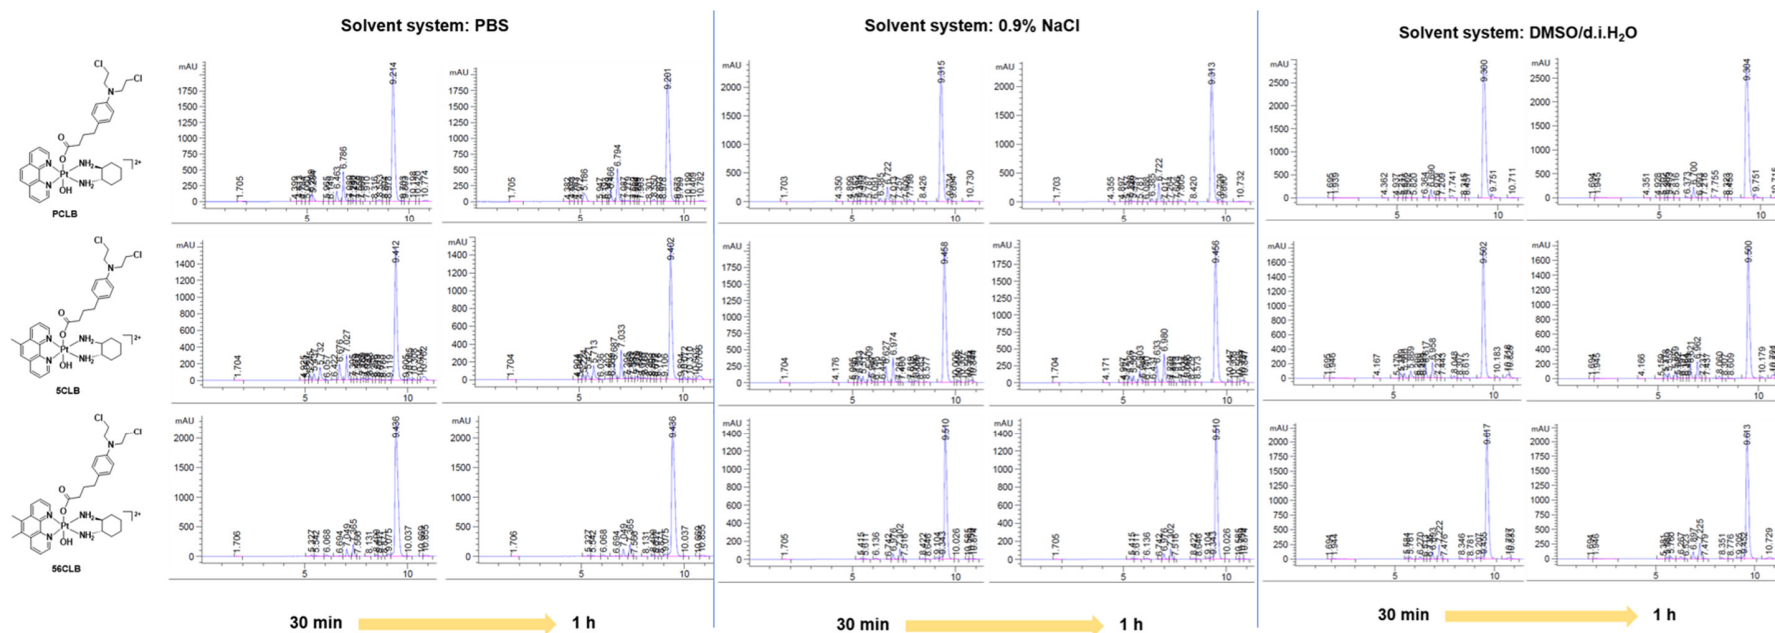

**Figure S32:** Combined HPLC chromatograms of **PCLB**, **5CLB** and **56CLB** in three solvent systems, obtained at 298 K. Inset: structures of **PCLB**, **5CLB** and **56CLB**.

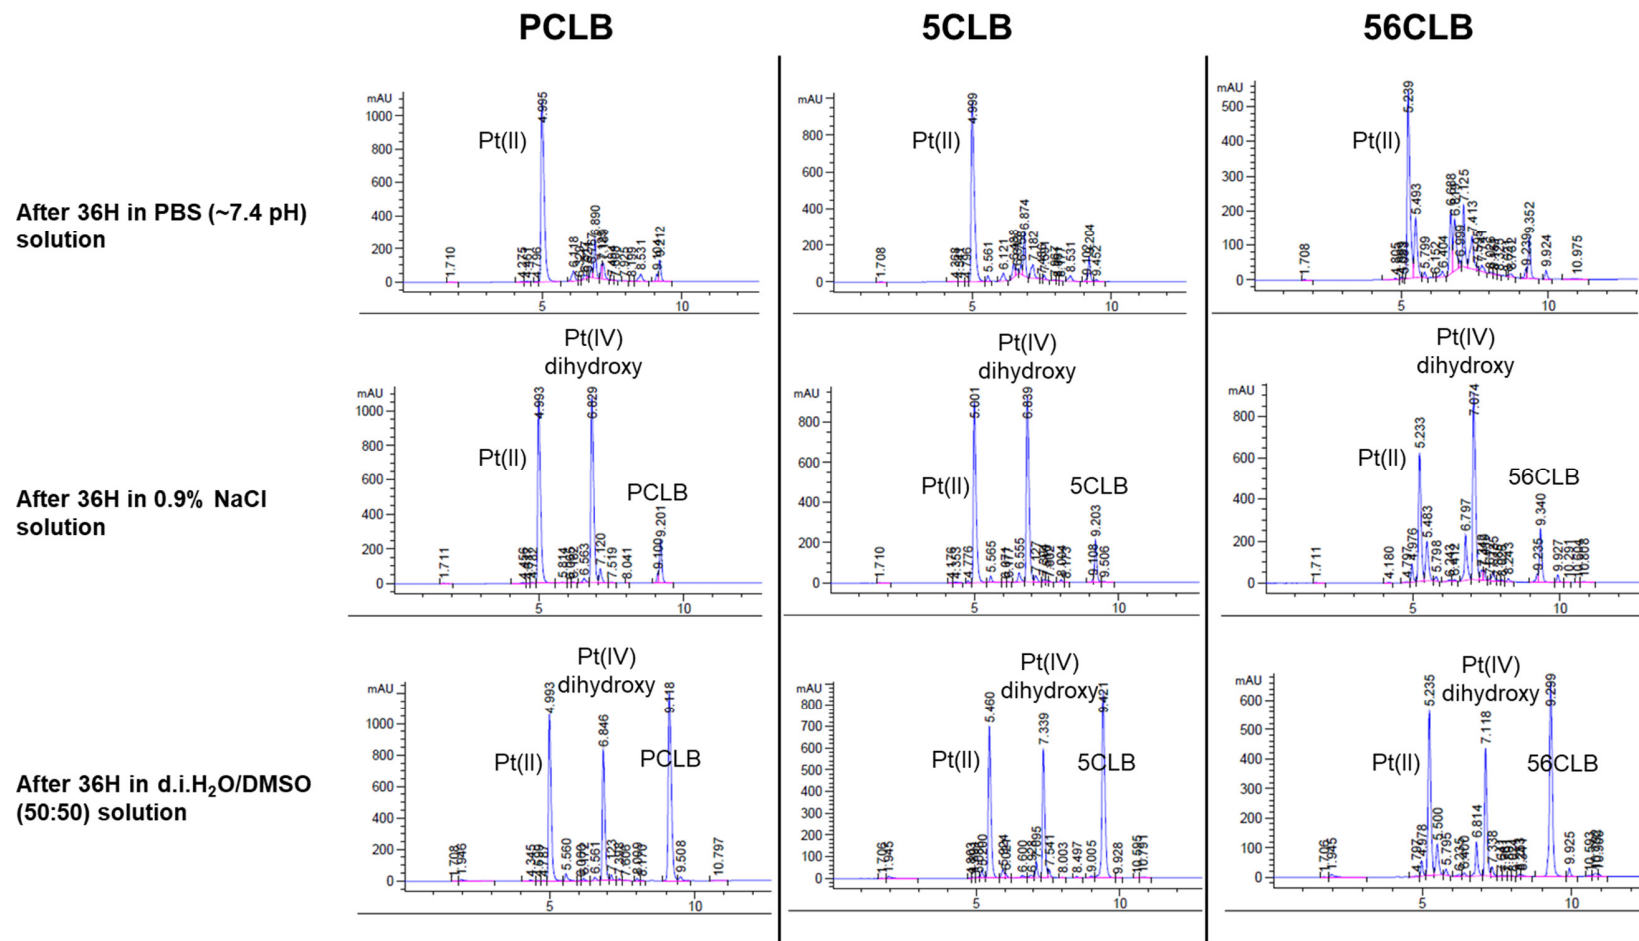

**Figure S33:** Combined HPLC chromatograms of **PCLB**, **5CLB** and **56CLB** in three solvent systems, obtained at 298 K at 36 h. Inset: structures of **PCLB**, **5CLB** and **56CLB**.

### Lipophilicity

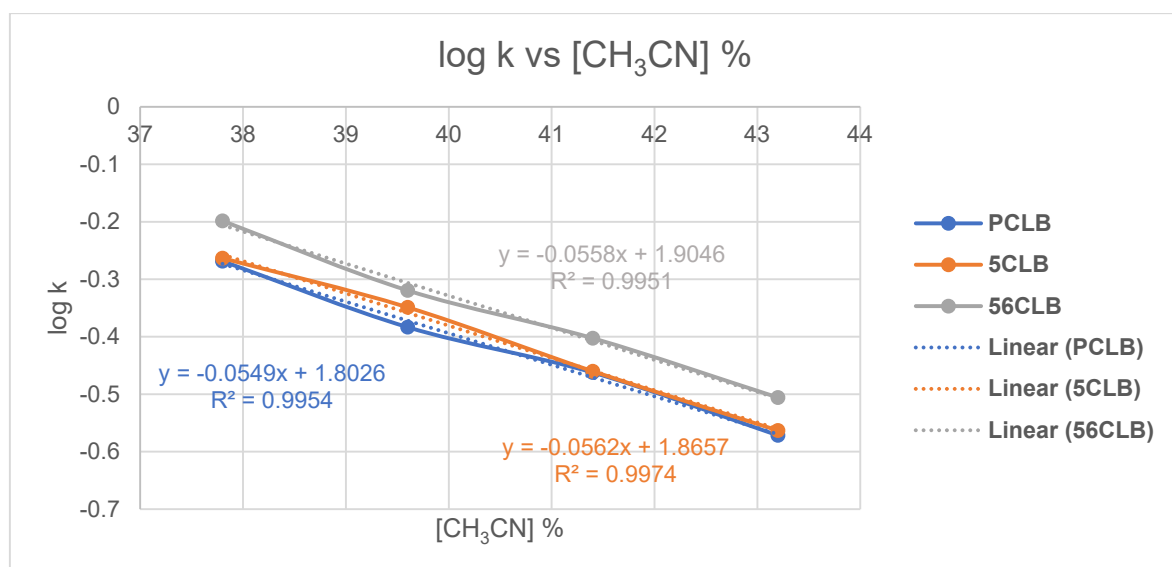

**Figure S34:** Generated plot curve of log *k* *versus* concentration of organic solvent, CH<sub>3</sub>CN to determine the chromatographic lipophilicity index, log *k*<sub>w</sub> of the platinum(IV)-CLB complexes.

### Reduction reaction experiments

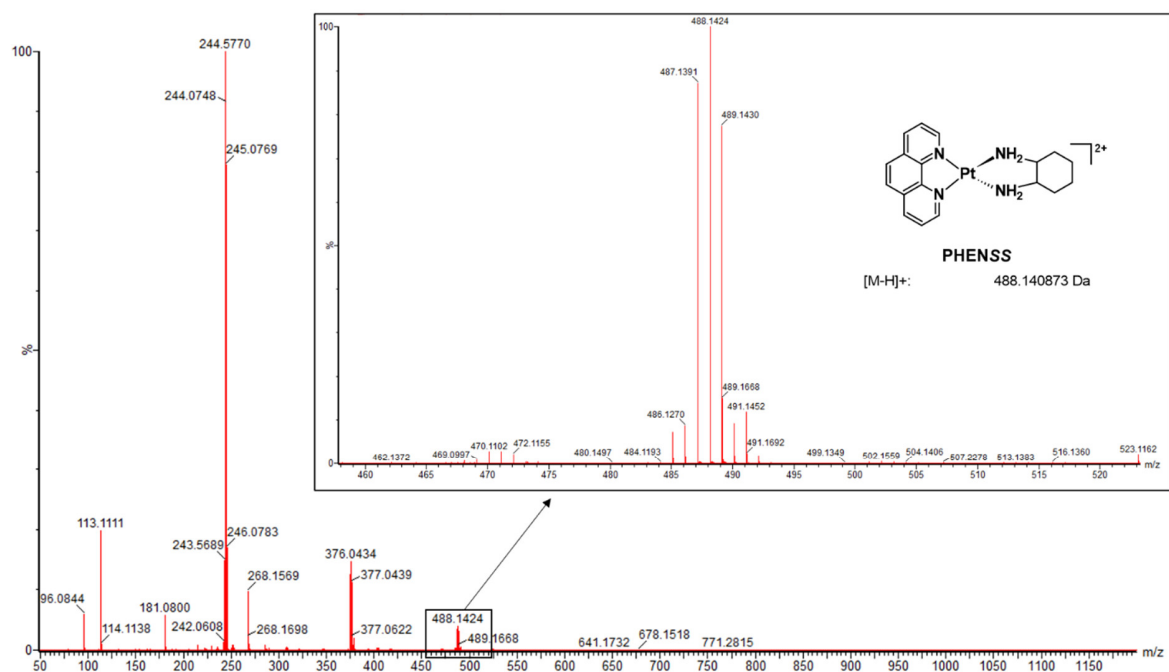

**Figure S35:** ESI-MS spectra of the reduced **PCLB** prodrug, highlighting the formation of the corresponding platinum(II) congener, **PHENSS**.

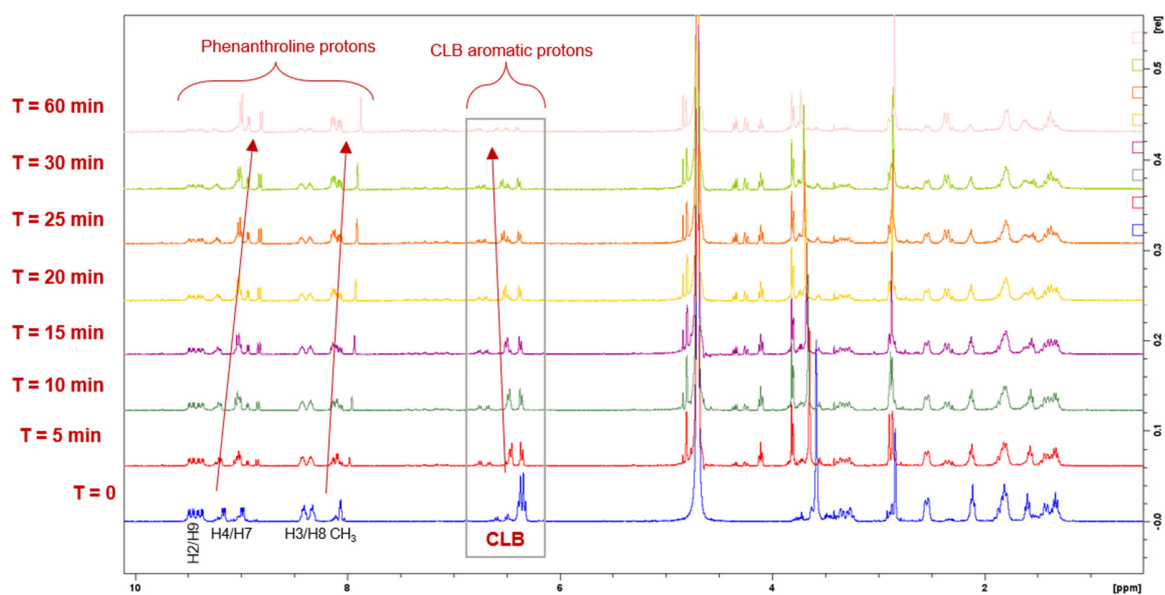

**Figure S36:**  $^1\text{H}$ -NMR spectra of **5CLB** with PBS and AsA in  $\text{D}_2\text{O}$  at 310.15 K, in different time intervals, highlighting the movement of resonances from the phenanthroline protons and the aromatic protons of the CLB ligand. **T** represents time in min.

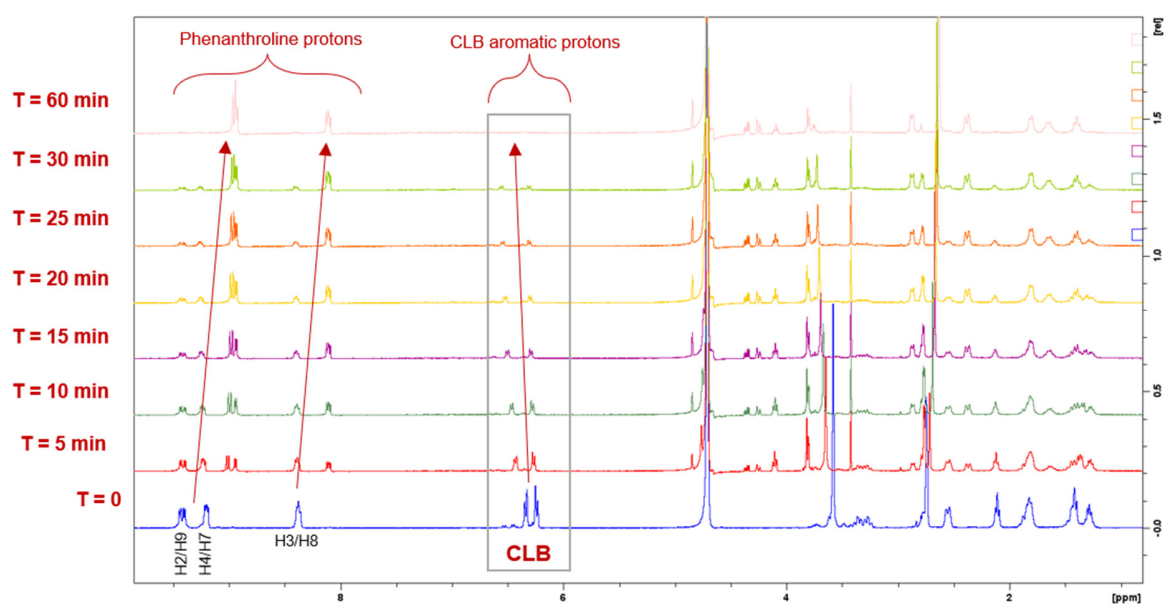

**Figure S37:**  $^1\text{H}$ -NMR spectra of **56CLB** with PBS and AsA in  $\text{D}_2\text{O}$  at 310.15 K, in different time intervals, highlighting the movement of resonances from the phenanthroline protons and the aromatic protons of the CLB ligand. **T** represents time in min.

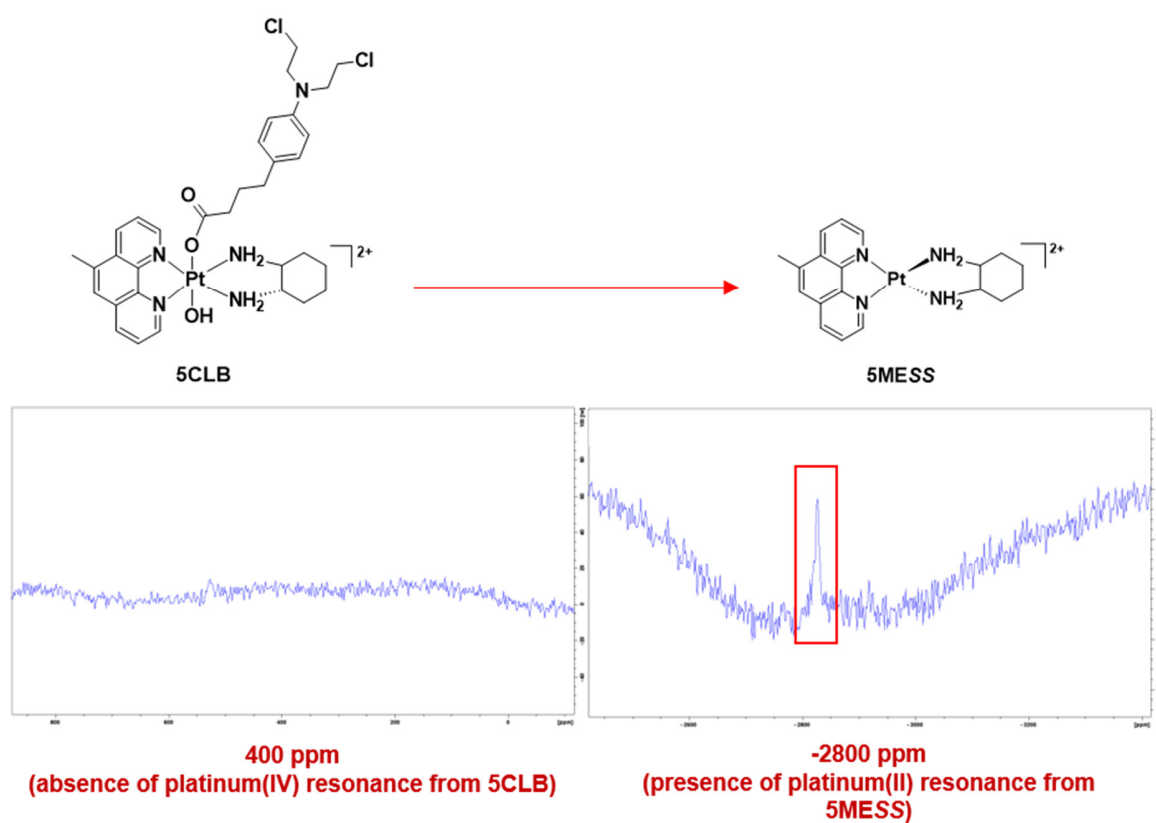

**Figure S38:** 1D- $^{195}\text{Pt}$  NMR spectra of **5CLB** with PBS and AsA in  $\text{D}_2\text{O}$  at 310.15 K, within the regions of 400 and -2800 ppm, highlighting the complete reduction of the complex after 1 h. Above: Structures of **5CLB** and its platinum(II) scaffold, **5MESS**.

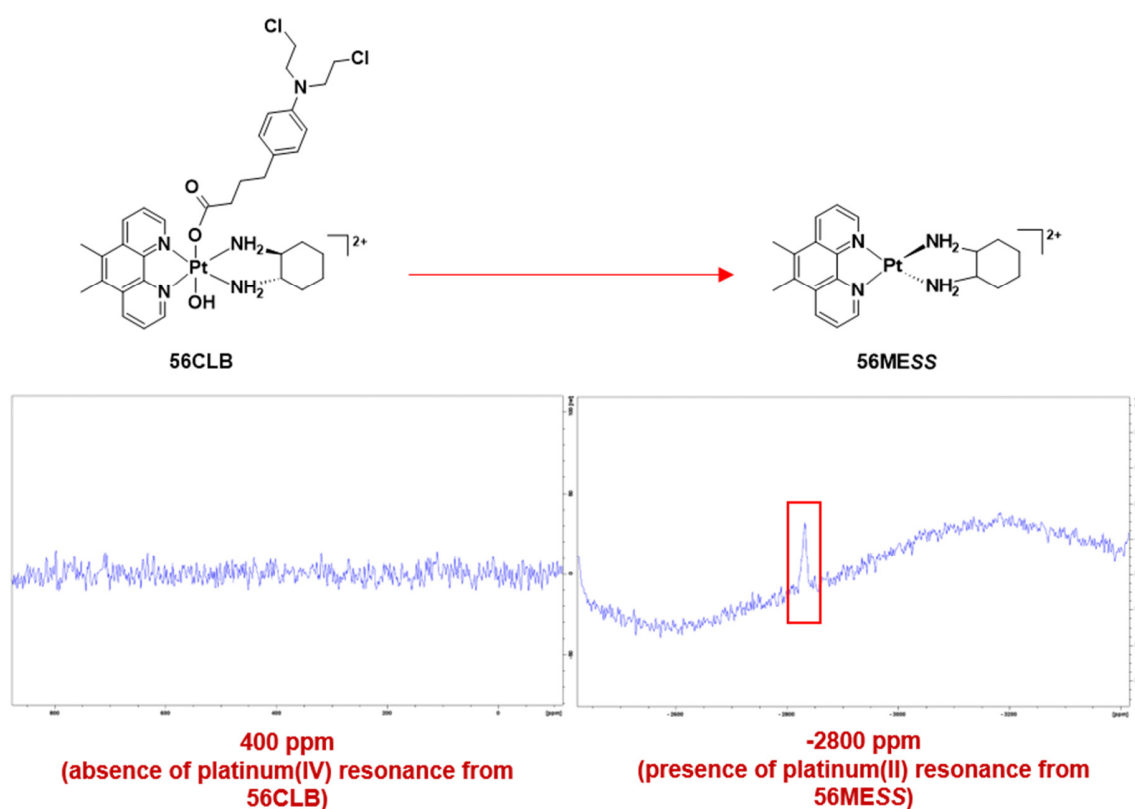

**Figure S39:**  $1D-^{195}\text{Pt}$  NMR spectra of **56CLB** with PBS and AsA in  $\text{D}_2\text{O}$  at 310.15 K, within the regions of 400 and -2800 ppm, highlighting the complete reduction of the complex after 1 h. Above: Structures of **56CLB** and its platinum(II) scaffold, **56MESS**.



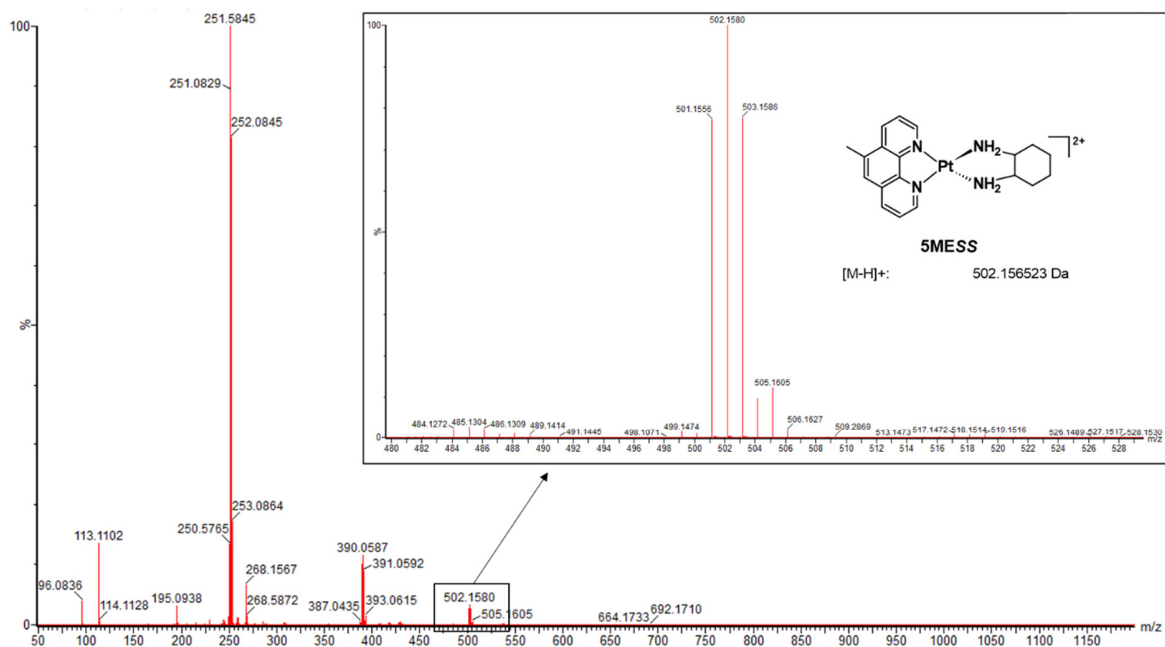

**Figure S40:** ESI-MS spectra of the reduced **5CLB** prodrug, highlighting the formation of the corresponding platinum(II) congener, **5MESS**.

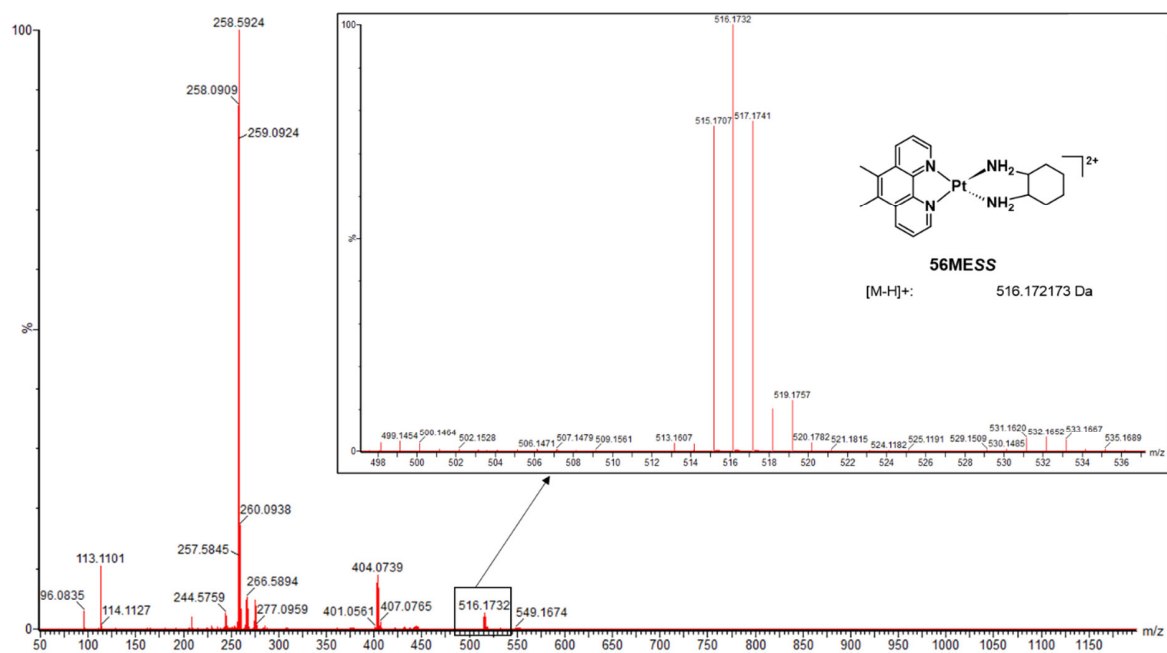

**Figure S41:** ESI-MS spectra of the reduced **56CLB** prodrug, highlighting the formation of the corresponding platinum(II) congener, **56MESS**.

## ROS experiments

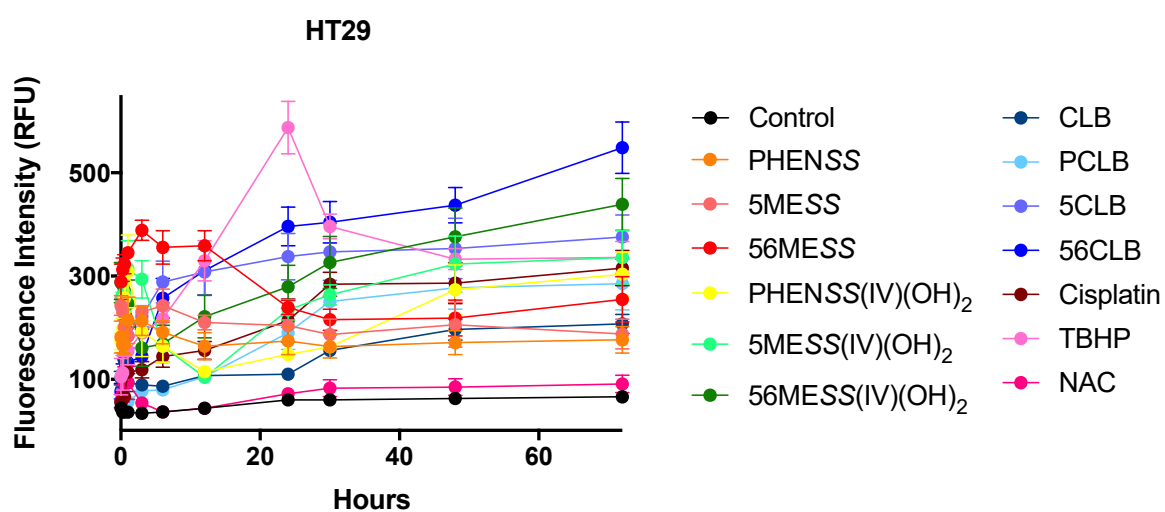

**Figure S42:** ROS production upon treatment with **PCLB**, **5CLB**, **56CLB**, cisplatin, together with precursor platinum(II) and (IV) scaffolds in HT29 colon cancer cell line at 0, 0.25, 0.5, 1, 3, 6, 12, 24, 48 and 72 h. TBHP: t-butyl hydroperoxide, NAC: N-acetylcysteine. Data points denote mean  $\pm$  SEM. n = 3 from three independent experiments where samples were run in triplicates.
